1  
2  
3  
4 *Drosophila* R8 photoreceptor cell subtype specification  
5 requires *Notch* and *hibris*.  
6  
7

8  
9 Hong Tan<sup>1,#a</sup>, Ruth E. Fulton<sup>1</sup>, Wen-Hai Chou<sup>2,#b</sup>, Denise A. Birkholz<sup>1</sup>,  
10 Meridee P. Mannino<sup>1</sup>, David M. Yamaguchi<sup>1</sup>, Steven G. Britt<sup>3,\*</sup>  
11

12  
13  
14 <sup>1</sup>Department of Cell and Developmental Biology, School of Medicine, University  
15 of Colorado Anschutz Medical Campus, Aurora, Colorado, United States of  
16 America  
17

18 <sup>2</sup>Department of Molecular Medicine, University of Texas Health Science Center,  
19 San Antonio, Texas, United States of America  
20

21 <sup>3</sup> Department of Neurology, Department of Ophthalmology, Dell Medical School,  
22 University of Texas at Austin, Austin, Texas, United States of America  
23

24 #aCurrent Address: Department of Pathology, School of Basic Medical Sciences,  
25 Xi'an Jiaotong University Health Science Center, China  
26

27 #b Current Address: Center for Neuropsychiatric Research, National Health  
28 Research Institutes, Miaoli, Taiwan.  
29

30 \* Corresponding Author  
31

32 E-mail: [steve.britt@austin.utexas.edu](mailto:steve.britt@austin.utexas.edu)

## 33 **Abstract**

34 Cell differentiation and cell fate determination in sensory systems are essential for stimulus  
35 discrimination and coding of environmental stimuli. Color vision is based on the differential  
36 color sensitivity of retinal photoreceptors, however the developmental programs that control  
37 photoreceptor cell differentiation and specify color sensitivity are poorly understood. In  
38 *Drosophila melanogaster*, there is evidence that the color sensitivity of different photoreceptors  
39 in the compound eye is regulated by inductive signals between cells, but the exact nature of  
40 these signals and how they are propagated remains unknown. We conducted a genetic screen  
41 to identify additional regulators of this process and identified a novel mutation in the *hibris*  
42 gene. *hibris* encodes an *irre* cell recognition module protein (IRM). These immunoglobulin  
43 super family cell adhesion molecules include human neph and nephrin (NPHS1). *hibris* is  
44 expressed dynamically in the developing *Drosophila melanogaster* eye and loss-of-function  
45 mutations give rise to a diverse range of mutant phenotypes including disruption of the  
46 specification of R8 photoreceptors cell diversity. The specification of blue or green sensitivity in  
47 R8 cells is also dependent upon *Notch* signaling. We demonstrate that *hibris* is required within  
48 the retina, non-cell autonomously for these effects, suggesting an additional layer of  
49 complexity in the signaling process that produces paired expression of opsin genes in adjacent  
50 R7 and R8 photoreceptor cells.

## 51 **Author Summary**

52 As humans, our ability to distinguish different colors is dependent upon the presence of three  
53 different types of cone cell neurons in the retina of the eye. The cone cells express blue, green  
54 or red absorbing visual pigments that detect and discriminate between these colors. The  
55 principle of color discrimination by neurons “tuned” to different colors is an evolutionarily

56 conserved specialization that occurs in many different animals. This specialization requires 1)  
57 visual pigments that detect different colors and 2) a developmental program that regulates the  
58 expression of these pigments in different types of cells. In this study we discovered that the  
59 fruit fly (*Drosophila melanogaster*) gene *hibris* is required for the developmental program that  
60 produces blue sensitive neurons in the fly retina. When we over-expressed *hibris* throughout  
61 the developing retina, extra blue sensitive cells were produced. These results demonstrate that  
62 if there is not enough *hibris*, too few blue sensitive cells form, but if there is too much *hibris*, too  
63 many blue sensitive cells form. Finally, we discovered that the *hibris* gene does not act in color  
64 sensitive neurons of the retina themselves. This surprising discovery suggests that *hibris* may  
65 influence development of the retina in a completely new and different way.

## 66 **Introduction**

67 Color vision in humans and most other organisms is dependent upon the expression of  
68 spectrally distinct visual pigments (opsins) in different photoreceptor cells [1-3]. The  
69 organization of photoreceptor cells within the retinal mosaic reflects a variety of different  
70 developmental mechanisms, including regional specialization, stochastic, and precise cell-cell  
71 adjacency [4]. *D. melanogaster* is capable of color vision and is a useful experimental system  
72 for examining the developmental programs that produce photoreceptor cells having different  
73 color sensitivities [5-12]. The compound eye consists of ~800 ommatidia, each containing eight  
74 rhabdomeric photoreceptor cells (R cells). The central R7 and R8 photoreceptor cells mediate  
75 polarization sensitivity and color vision [13, 14]. As shown in **Fig 1**, the majority of ommatidia  
76 contain matched pairs of R7 and R8 cells expressing specific rhodopsin (Rh) visual pigments,  
77 either *Rhodopsin 3* (*Rh3*, FBgn0003249) and *Rhodopsin 5* (*Rh5*, FBgn0014019) (tandem  
78 magenta-blue cylinders), or *Rhodopsin 4* (*Rh4*, FBgn0003250) and *Rhodopsin 6* (*Rh6*,  
79 FBgn0019940) (tandem yellow-green cylinders).

80           These two main ommatidial subtypes were initially identified based on pale or yellow  
81 fluorescence when illuminated with blue light [15, 16], with pale (pR7/pR8) expressing  
82 *Rh3/Rh5*, while yellow (yR7/yR8) cell pairs express *Rh4/Rh6* (**Fig 1**) [10, 11, 17]. This paired  
83 expression of opsin genes in adjacent R7 and R8 cells within an individual ommatidium is  
84 thought to result from a series of developmental steps. First, a subset of R7 cells stochastically  
85 and cell autonomously express *spineless* (*ss*, FBgn0003513) which represses *Rh3* and  
86 induces *Rh4* expression [18]. In pR7 cells that stochastically fail to express *ss* and do express  
87 *Rh3*, a signal is initiated that induces the expression of *Rh5* in adjacent pR8 cells. Extensive  
88 studies have identified the genes *warts* (*wts*, FBgn0011739), *melted* (*melt*, FBgn0023001),  
89 members of the *hippo* (*hpo*, FBgn0261456) pathway, along with the TGF $\beta$  superfamily  
90 receptors *baboon* (*babo*, FBgn0011300) and *thick vein* (*tkv*, FBgn0003726), and their  
91 respective ligands as components of the inductive signal from pR7 that drives the expression  
92 of *Rh5* in pR8 [12, 19-21]. In the absence of a signal from yR7, the default yR8 fate and  
93 expression of *Rh6* occurs. In addition, we have found that the *Epidermal growth factor receptor*  
94 (*Egfr*, FBgn0003731) and *rhuboid* (*rho*, FBgn0004635) are also required for this process [22,  
95 23].

96           Here we undertook a genetic screen to identify additional genes required for this  
97 process and show that *hibris* (*hbs*, FBgn0029082), an *irre* Cell Recognition Molecule (IRM)  
98 [24], NPHS1 (nephrin, *Homo sapiens*, HGNC:9801) related member of the Immunoglobulin  
99 Super Family (IgSF), as well as *Notch* (*N*, FBgn0004647) are required for the establishment of  
100 paired opsin expression in adjacent R7 and R8 photoreceptor cells. Interestingly, we found that  
101 *hbs* is required non-cell autonomously for this process, suggesting the involvement of  
102 additional interactions between R7, R8 and neighboring cells.

## 103 Results

### 104 Isolation and characterization of the *a69* mutant.

105 To identify genes required for the induction of *Rh5* expression in R8 photoreceptors, we  
106 screened a collection of approximately 150 homozygous viable eye-expressing enhancer trap  
107 lines carrying insertions of the *P{etau-lacZ}* transposon (FBtp0001352) [25]. This was based  
108 on the rationale that genes required for the induction of *Rh5* expression would be expressed in  
109 the eye, the *P{etau-lacZ}* transposon has been especially useful in studies of the nervous  
110 system, and insertion of this element into loci of interest would provide a convenient means to  
111 identify the affected genes [25]. The percentage of *Rh5*-expressing R8 cells was determined  
112 by labeling dissociated ommatidia with antibodies against *Rh5* and *Rh6*. Several mutants with  
113 abnormal percentages of *Rh5*-expressing R8 cells were noted and *a69* (FBgn0026612), with  
114 the lowest percentage of *Rh5* (9%) was further characterized. Immunostaining of both  
115 dissociated ommatidia and tissue sections showed that in the *a69* enhancer-trap line, *Rh5*-  
116 expressing R8 cells are reduced and most R8 cells have assumed the default fate and express  
117 *Rh6* (**Fig 2A-E, Table 1**). Since mutants lacking R7 cells or having a reduced number of Rh3  
118 expressing R7 cells would also show diminished *Rh5* expression, we examined the expression  
119 of the opsins expressed in the R7 cells and found that the percentage of *Rh3* expressing R7  
120 cells was similar to *white*<sup>1118</sup> (*w*<sup>1118</sup>, RRID:BDSC\_3605) control flies (41.9%, **Table 1**).  
121 However, there was a dramatic mispairing between *Rh3* expressing R7 cells adjacent to *Rh6*  
122 expressing R8 cells (**Fig 2C,F, Table 1**) compared to *cinnabar*<sup>1</sup> *brown*<sup>1</sup> controls (*cn*<sup>1</sup> *bw*<sup>1</sup>,  
123 RRID:BDSC\_264) consistent with the idea that the *a69* enhancer trap line carries a mutation in  
124 a gene required for the induction of *Rh5* expression in R8 cells.

125

126 **Table 1. Opsin Expression in Different Genetic Backgrounds.**

| Genotype                             | R8 cells expressing <i>Rh5</i><br>% (n)                           | R7 cells expressing <i>Rh3</i><br>% (n) | Mis-pairing<br>% (n)                                                                                                     | Figure   |
|--------------------------------------|-------------------------------------------------------------------|-----------------------------------------|--------------------------------------------------------------------------------------------------------------------------|----------|
| <i>w<sup>1118</sup></i>              | 29 (214)                                                          | 47 (362)                                | <i>Rh4/Rh5</i> 0 (424)                                                                                                   | 2A, B, C |
| <i>a69</i>                           | 9 (335)<br>SDF <i>w<sup>1118</sup></i> , $p = 1.9 \times 10^{-9}$ | 42 (241)                                | <i>Rh3/Rh6</i> 25 (253)<br>SDF <i>cn<sup>1</sup> bw<sup>1</sup></i> , $p = 1.2 \times 10^{-8}$<br><i>Rh4/Rh5</i> 0 (315) | 2D, E, F |
| <i>cn<sup>1</sup> bw<sup>1</sup></i> | ND                                                                | ND                                      | <i>Rh3/Rh6</i> 6 (240)                                                                                                   |          |

127 Statistical comparisons of strains were carried out as described in the Methods; n= the number of ommatidia  
 128 counted. Unless indicated, the observed percentages were not significantly different from *w<sup>1118</sup>*. Strains compared  
 129 to another control are indicated. Abbreviations are as follows: Significantly Different From (SDF) the strain  
 130 indicated, at the  $p$  value shown by a two tailed test; Not Determined (ND); Not Applicable (NA).

131 To isolate the gene responsible for the *a69* phenotype, the location of the P-element  
 132 insertion in *a69* was determined and found to map to the right arm of the second chromosome  
 133 at position 60E (data not shown). To determine whether the P-element in *a69* is the cause of  
 134 the phenotype, P-element excision lines were generated and analyzed. Thirty-five  
 135 homozygous strains of these excision chromosomes were analyzed by staining dissociated  
 136 ommatidia with antibodies against *Rh5* and *Rh6*, and all of them (100%) were found to have a  
 137 low *Rh5* percentage, similar to that of *a69* (data not shown). Only 1% of excision strains would  
 138 be expected to retain the mutant phenotype as a result of imprecise excision, thus our inability  
 139 to revert the mutant phenotype is consistent with the *a69* P-element not being responsible for  
 140 the mutation [26]. Furthermore, mapping via recombination analysis revealed that the *a69*  
 141 mutation is localized to the interval between the *purple* (*pr*, FBgn0003141) and *curved* (*c*,  
 142 FBgn0000245) genes in the middle the second chromosome (**Fig 3, S 1 Table**), far away from  
 143 the P-element insertion site in *a69*. From this we conclude that the *a69* mutation is not  
 144 associated with the insertion of the P-element. Thirty-three deficiency lines located in the  
 145 region between *pr* and *c* were tested for *a69* complementation (**Fig 4, S 2 Table**). These

146 analyses narrowed the location of the *a69* mutation to 51C3-51D1 (**Fig 4**). The lower portion of  
147 **Fig 4** shows a diagram of this genomic region, spanning ~300 Kb and encompassing 25  
148 known protein coding genes.

149 To identify the gene specifically in the *a69* mutation, we took two approaches. First, a  
150 subset of genes were examined for alterations in expression in the *a69* mutant, and second, a  
151 large series of complementation studies were performed with alleles of known mutants in the  
152 region. cDNAs from 5 genes in the region were obtained and *in-situ* hybridization of third instar  
153 larval eye imaginal discs was performed on *cn<sup>1</sup> bw<sup>1</sup>* (wild-type) and *a69* mutants. In each case  
154 the expression pattern of the gene was not substantially disrupted in *a69* mutants, suggesting  
155 that the phenotype is not due to the disruption of patterned mRNA expression of these genes  
156 in the 3rd instar eye-antennal disc. (**Fig 5**). *hibris* (*hbs*) was expressed strongly in the  
157 morphogenetic furrow and maintained weakly posteriorly, consistent with a previous report  
158 [27]. It was also expressed in the ocellar region and in the developing antenna. *parcas* (*pcs*,  
159 FBgn0033988) was expressed strongly in the morphogenetic furrow and in the antenna.  
160 *CG10265* (FBgn0033990) did not appear to be expressed in either the eye or antennal  
161 regions. *CG7639* (FBgn0033989) appeared to be weakly expressed in the region anterior to  
162 the morphogenetic furrow. *caskin* (*ckn*, FBgn0033987) was expressed anterior to the furrow  
163 and in the antenna.

164 We characterized *Rh5* and *Rh6* expression in animals heterozygous for *a69* and alleles  
165 of *Additional sex combs* (*Asx*, FBgn0261823), *atypical protein kinase C* (*aPKC*,  
166 FBgn0261854), *bocce* (*boc*, FBgn0011203), *charlatan* (*chn*, FBgn0015371), *Enhancer of*  
167 *GMR-sina 2-1* (*ES2-1*, FBgn0024358), *Hexokinase C* (*Hex-C*, FBgn0001187), *knot* (*kn*,  
168 FBgn0001319), *Regulatory particle non-ATPase 6* (*Rpn6*, FBgn0028689), *safranin* (*sf*,  
169 FBgn0003367), *Protein 1 of cleavage and polyadenylation factor 1* (*Pcf11*, FBgn0264962),  
170 *scab* (*scb*, FBgn0003326), and transposon insertions P{A<sub>26</sub>O<sub>9</sub>}1 (FBti0001751) and  
171 P{lacW}B6-2-25 (FBti0005748). All of these mutations complemented *a69* (data not shown).

172 We obtained the following alleles of *hbs*: *hbs*<sup>361</sup>(FBal0130217), *hbs*<sup>459</sup>, (FBal0130216),  
 173 *hbs*<sup>1130</sup> (obtained from M. Baylies) and *hbs*<sup>2593</sup> (FBal0130218). With one exception, all of these  
 174 alleles fail to complement *a69*, **Table 2**. Furthermore, *hbs*<sup>361</sup> homozygotes and heteroallelic  
 175 combinations of these alleles all show a substantial decrease in the proportion of *Rh5*  
 176 expression in R8 photoreceptor cells. With four exceptions, viable combinations of these  
 177 alleles over deficiencies in the region show the same complementation pattern as the *a69*  
 178 mutant, **S3 Table**.

179 **Table 2. Complementation crosses of *a69*, *hbs* alleles and *cn bw* control.**

| Genotype of Strains Crossed | <i>hbs</i> <sup>361</sup> | <i>hbs</i> <sup>459</sup>                         | <i>hbs</i> <sup>1130</sup> | <i>hbs</i> <sup>2593</sup> | <i>cn</i> <sup>1</sup> <i>bw</i> <sup>1</sup>     |
|-----------------------------|---------------------------|---------------------------------------------------|----------------------------|----------------------------|---------------------------------------------------|
| <i>a69</i>                  | 5.0% (337)                | 22.9% (1164)<br><i>p</i> = 1.7 X 10 <sup>-4</sup> | 10.4% (201)                | 1.5% (455)                 | 25.7% (152)<br><i>p</i> = 6.4 X 10 <sup>-4</sup>  |
| <i>hbs</i> <sup>361</sup>   | 16.6% (404)               | 3.3% (456)                                        | 1.4% (358)                 | 2.7% (414)                 | 29.1% (320)<br><i>p</i> = 1.4 X 10 <sup>-6</sup>  |
| <i>hbs</i> <sup>459</sup>   |                           |                                                   | 3.9% (799)                 | 2.5% (651)                 | 33.3% (699)<br><i>p</i> = 1.3 X 10 <sup>-10</sup> |
| <i>hbs</i> <sup>1130</sup>  |                           |                                                   |                            | 1.2% (326)                 | 26.8% (503)<br><i>p</i> = 5.2 X 10 <sup>-6</sup>  |
| <i>hbs</i> <sup>2593</sup>  |                           |                                                   |                            |                            | 30.7% (703)<br><i>p</i> = 8.5 X 10 <sup>-9</sup>  |

180 Statistical comparisons of strains were carried out as described in the Methods. Values shown are percentage of  
 181 R8 cells expressing Rh5 (number of ommatidia counted). The crossed alleles fail to complement *a69* and each  
 182 other (shaded gray). Complementation in this table (unshaded) is an *Rh5*% significantly greater than *a69*  
 183 homozygotes (12.7% (267)) by a one tailed test at the *p* value shown.

184 Exon sequencing of the *hbs* gene failed to identify unique polymorphisms in the *a69*  
 185 mutant that were absent in phenotypically wild type control strains (data not shown).  
 186 Nonetheless, given that the gene spans over 30 Kb including 24 Kb in the first intron, it seems  
 187 likely that a mutation within a regulatory region of the gene may be responsible for the  
 188 hypomorphic *a69* phenotype and the complex complementation pattern found with the *hbs*<sup>459</sup>  
 189 allele. Thus, we believe the complementation data is fully consistent with *a69* being a *hbs*  
 190 allele, *hbs*<sup>*a69*</sup>.



191 ***hibris* is expressed in the developing third instar eye imaginal disc.**

192 Consistent with previous studies [28], we find that *hbs* is expressed in the developing  
193 third instar eye imaginal disc in preclusters of photoreceptor cells emerging from the  
194 morphogenetic furrow and ultimately in all photoreceptor cells, **Fig 6**. *hbs* is expressed  
195 coordinately with early *senseless* (*sens*, FBgn0002573) expression in R8 just posterior to the  
196 morphogenetic furrow and this is followed by *prospero* (*pros*, FBgn0004595) expression in R7  
197 cells 6-8 rows posterior and cone cells.

198 ***hibris* is required in the retina for R7 and R8 cell differentiation.**

199 To examine the function of *hbs* in Rh5 and Rh6 expression in R7 and R8 photoreceptor  
200 cell patterning, we examined an additional allele of *hbs* in mosaic flies. We used the *ey-FLP*  
201 driver to generate homozygous mutant clones in the retina and optic lobes of animals that  
202 were heterozygous for *hbs*<sup>1130</sup>. We used a cell autonomous lethal to generate large  
203 homozygous mutant clones and eliminate homozygous wildtype tissue, as described [29]. **Fig**  
204 **7** shows a small heterozygous clone with a single *Rh5* expressing R8 cell in an otherwise  
205 homozygous mutant retina where *Rh3* expressing R7 cells are mispaired with *Rh6* expressing  
206 R8 cells, demonstrating a phenotype identical to *a69*.

207 To further refine the spatial requirement for *hbs* in R7 and R8 photoreceptor cell  
208 differentiation and opsin gene expression we compared mutant clones of *hbs*<sup>66</sup> (FBal0239852)  
209 [30] generated using *ey-FLP* and *ey3.5-FLP* [31]. *ey3.5-FLP* is a modified form of *ey-FLP* that  
210 efficiently induces clone formation in the third instar larval eye imaginal disc, but not in the  
211 lamina or medulla. **Fig 6A** shows loss of *hbs* in the retina and optic lobe leads to a dramatic  
212 decrease in *Rh5* expression and mispairing of *Rh3* and *Rh6* in adjacent R7 and R8 cells of  
213 individual ommatidia, consistent with the results obtained with *hbs*<sup>1130</sup>, **Fig 5**. This is in contrast  
214 to *Rh3*, *Rh5* and *Rh6* expression in a similarly FRT recombined clone of a wild type  
215 chromosome. By comparison, retina specific clones generated with *ey3.5-FLP* [31] also show  
216 a loss of *Rh5* expression and mispairing of *Rh3* and *Rh6*. These results indicate that *hbs* is

217 required in the retina for normal R7 and R8 photoreceptor cell differentiation and opsin gene  
218 expression.

219 **Overexpression of *hbris* is sufficient to disrupt R7 and R8 cell differentiation.**

220 To determine whether ectopic expression of *hbs* is sufficient to induce the expression of  
221 *Rh5* in R8 photoreceptor cells, we over-expressed *hbs* using the GAL4-UAS system [32] and  
222 the *P{GAL4-ninaE.GMR}* driver (FBtp0001315). **Fig 7A** shows that overexpression of *hbs* is  
223 sufficient to induce *Rh5* expression in many, but not all R8 photoreceptor cells. This occurs  
224 without perturbation of *Rh3/Rh4* R7 cell subtype ratio and is accompanied by mismatched  
225 *Rh4/Rh5* expressing R7/Rh8 photoreceptor cells pairs (not shown). To test whether the  
226 formation of these mismatched ommatidia could result from an inappropriate signal from *Rh4*  
227 expressing R7 cells or a defect in the default pathway and expression of *Rh6* in R8 cells, we  
228 overexpressed *hbs* in a *sev* mutant background that lacks R7 photoreceptor cells. **Fig 7B**  
229 shows that removal of R7 cells leads to a dramatic reduction but not elimination of *Rh5*  
230 expression. These results suggest that the ability of overexpressed *hbs* to induce *Rh5*  
231 expression in R8 cells is primarily or partially R7 photoreceptor cell independent.

232 ***hbris* is required non-cell autonomously for R7 and R8 cell differentiation.**

233 To determine whether *hbs* is required cell-autonomously in the R7 and/or R8  
234 photoreceptor cells to enable normal paired expression of *Rh3* and *Rh5*, we generated smaller  
235 *hbs*<sup>66</sup> mutant clones in a heterozygous background as previously described [22]. Cells that are  
236 either wild type or heterozygous express a myristoylated, membrane associated GFP  
237 (*myr.GFP*, *P{GMR-myr.GFP}*, FBtp0017435), whereas cells that are homozygous mutant for  
238 *hbs* do not express *myr.GFP* [33]. We dissociated ommatidia from animals constructed in this  
239 manner and counted the expression of *Rh5* versus *Rh6* in ommatidia that expressed *Rh3* in  
240 the R7 cell and in which the genotype of the R7 and R8 cells could be scored. **Fig 8A** shows a  
241 cluster of ommatidia from the experiment labeled with antibodies against *Rh3*, *Rh4*, *Rh5*, *Rh6*,  
242 with *myr.GFP* labeling shown in **Fig 8B**. Mispairing of *Rh3-Rh6* expression occurs in ~ 20% of

243 *cn<sup>1</sup> bw<sup>1</sup>* ommatidia that express *Rh3* in R7 cells (Fig 8C), consistent with previous results [11,  
244 22, 23]. In the mosaic analysis, there is a statistically significant increase in the percentage of  
245 mispaired *Rh3-Rh6* expressing ommatidia ranging from 56 – 100%, regardless of the genotype  
246 of the R7 and R8 photoreceptor cells. Particularly noteworthy is the highly abnormal and  
247 pronounced effect on ommatidia in which both R7 and R8 photoreceptor cells are  
248 heterozygous or homozygous wild-type (R7+ R8+). These results unambiguously indicate that  
249 *hbs* is required non-cell autonomously for the establishment of paired opsin gene expression in  
250 the R7 and R8 photoreceptor cells. Although the severity of the mispairing is increased  
251 significantly in ommatidia in which R7 and R8 cells are both mutant (R7- R8-).

### 252 ***Notch* is required for R7 and R8 cell differentiation.**

253 *N* signaling plays an essential and reiterative role in the development of the compound  
254 eye [34], and is known to regulate *hbs* during myoblast fusion [35, 36], control cell adhesion in  
255 the eye through interactions with *hbs* [37], and *hbs* may also play a role in *N* cleavage [28]. To  
256 determine whether *N* is required for the establishment of paired opsin gene expression in the  
257 R7 and R8 photoreceptor cells, we reduced *N* activity at sequential stages of pupal  
258 development. We used shifts to a restrictive temperature of a temperature sensitive allele *N<sup>1N</sup>-*  
259 *ts<sup>1</sup>* (FBal0012887) in an otherwise *cn<sup>1</sup> bw<sup>1</sup>* background and compared with similarly treated *cn<sup>1</sup>*  
260 *bw<sup>1</sup>* controls. **Fig 9A** shows that at baseline without heat shock *N<sup>1N</sup>-ts<sup>1</sup>; cn<sup>1</sup> bw<sup>1</sup>* flies have a  
261 significantly increased proportion of *Rh3:Rh4* expressing R7 cells compared to *cn<sup>1</sup> bw<sup>1</sup>*  
262 controls. The *Rh3:Rh4* ratio is significantly increased with heat shock at 24-36 hours after  
263 puparium formation (APF) and significantly decreased with heat shock at 36-48 hr APF  
264 compared to *N* mutants raised at the non-restrictive temperature. Because the variation of the  
265 *Rh3:Rh4* ratio in R7 cells would be expected to alter the *Rh5:Rh6* ratio in R8 photoreceptors,  
266 we specifically examined the percent of *Rh3-Rh6* mispairing as an index of impaired induction  
267 of *Rh5* expression. We found that *Rh3-Rh6* mispairing was significantly increased in both *N<sup>1N</sup>-*  
268 *ts<sup>1</sup>; cn<sup>1</sup> bw<sup>1</sup>* animals and *cn<sup>1</sup> bw<sup>1</sup>* control animals heat shocked from 0-12 hr APF, **Fig 9B**.

269        Statistically significant increases in *Rh3-Rh6* mispairing were noted at 24-36 hr APF, 36-48 hr  
270        APF and 48-60 hr APF in *N* mutant animals demonstrating a highly significant disruption in the  
271        paired expression of opsin genes in R7 and R8 photoreceptor cells. Because of heat shock  
272        induced lethality at 12-24 hr APF in *cn<sup>1</sup> bw<sup>1</sup>* control animals, results at this time point are  
273        difficult to interpret. However, these results conclusively demonstrate a requirement for *N*  
274        activity in regulating 1) *Rh3* versus *Rh4* expression in the pR7 and yR7 photoreceptors and 2)  
275        coupling of *Rh3/Rh5* expression in adjacent pR7 and pR8 photoreceptor cells of the same  
276        ommatidium.  
277

## 278 **Materials and Methods**

### 279 **Stocks and Genetics**

280 Stocks were maintained in humidified incubators on cornmeal / molasses / agar media  
281 or standard cornmeal food with malt, and transferred on a rotating basis every three weeks as  
282 described [38-40]. *D. melanogaster* strains were obtained from individual laboratories or the  
283 Bloomington *Drosophila* Stock Center (BDSC). Genotypes were constructed using  
284 conventional genetic techniques, dominant markers and appropriate balancer chromosomes  
285 [39, 41].

### 286 **Genotypes of Animals Shown in Figures**

287 **Figure 2 A, B, C:**  $w^{1118}$

288 **Figure 2 D, E, F:**  $w^{1118}; P\{\text{etau-lacZ}\}a69$

289 **Figure 5, Left column:** WT =  $cn^1 bw^1$ , **Right column:**  $w^{1118}; P\{\text{etau-lacZ}\}a69$

290 **Figure 6:**  $cn^1 bw^1$

291 **Figure 7:**  $y^{d2} w^{1118} P\{ry^{+7.2}=ey\text{-FLP.N}\}2 / w^{1118}; P\{w^{+mW.hs}=FRT(w^{hs})\}G13 L^* /$

292  $P\{w^{+mW.hs}=FRT(w^{hs})\}G13 hbs^{1130}$

293 **Figure 8A:**  $w^{1118}/y^{d2} w^{1118} P\{ry^{+7.2}=ey\text{-FLP.N}\}2 P\{GMR\text{-lacZ.C}(38.1)\}TPN1;$

294  $P\{ry^{+7.2}=neoFRT\}42D hbs^{66}/P\{ry^{+7.2}=neoFRT\}42D P\{w^{+t^*} ry^{+t^*}=white\text{-un1}\}47A I(2)cl\text{-R11}^1$

295 **Figure 8B:**  $w^{1118}/y^{d2} w^{1118} P\{ry^{+7.2}=ey\text{-FLP.N}\}2 P\{GMR\text{-lacZ.C}(38.1)\}TPN1;$

296  $P\{ry^{+7.2}=neoFRT\}42D P\{w^{+t^*} ry^{+t^*}=white\text{-un1}\}47A / P\{ry^{+7.2}=neoFRT\}42D P\{w^{+t^*} ry^{+t^*}=white\text{-un1}\}47A I(2)cl\text{-R11}^1$

297

298 **Figure 8C:**  $w^{1118}/P\{w^{+mC}=ey3.5\text{-FLP.B}\}1, y^1 w^*$ ;  $P\{ry^{+7.2}=neoFRT\}42D hbs^{66}/$

299  $P\{ry^{+7.2}=neoFRT\}42D P\{w^{+t^*} ry^{+t^*}=white\text{-un1}\}47A I(2)cl\text{-R11}^1$

300 **Figure 8D:**  $w^{1118}/P\{w^{+mC}=ey3.5\text{-FLP.B}\}1, y^1 w^*$ ;  $P\{ry^{+7.2}=neoFRT\}42D P\{w^{+t^*}$

301  $ry^{+t^*}=white\text{-un1}\}47A / P\{ry^{+7.2}=neoFRT\}42D P\{w^{+t^*} ry^{+t^*}=white\text{-un1}\}47A I(2)cl\text{-R11}^1$

302 **Figure 9A:**  $w^{1118}; P\{GAL4\text{-ninaE.GMR}\}12 / P\{UAS\text{-hbs.A}\}$

303 **Figure 9B:**  $w^{1118} sev^{14}; P\{GAL4-ninaE.GMR\}12 / P\{UAS-hbs.A\}$

304 **Figure 10:**  $w^{1118}/y^{d2} w^{1118} P\{ry^{+t7.2}=ey-FLP.N\}2 P\{GMR-lacZ.C(38.1)\}TPN1;$   
305  $P\{ry^{+t7.2}=neoFRT\}42D hbs^{66}/ P\{ry^{+t7.2}=neoFRT\}42D P\{w^{+mC}=GMR-myr.GFP\}2R$

306 **Figure 11:**  $cn^1 bw^1 (cn bw)$  or  $y^1 N^{1N-ts1} g^2 f^1; cn^1 bw^1. (N; cn bw)$

### 307 Immunohistochemistry

308 10 $\mu$ m cryosections were prepared and treated as previously described [11]. Dissociated  
309 ommatidia were prepared from six animals. Eyes were cut from heads using 28 gauge needles  
310 in Phosphate Buffered Saline (PBS). The retina, cornea +/- lamina tissue was shredded with  
311 needles, triturated 10 X with a 200  $\mu$ L pipette tip and transferred to a microscope slide to dry at  
312 RT. Subsequent treatment was the same as cryosections. Antibodies were used at the  
313 following dilutions: directly conjugated mouse monoclonal anti-Rh5 (Texas Red, 1:100, RRID:  
314 AB\_2736994) and directly conjugated mouse monoclonal anti-Rh6 (FITC, 1:100  
315 RRID:AB\_2736995) [42], mouse monoclonal anti-Rh4 (clone 11E6, 1:10, RRID:AB\_2315271)  
316 [11, 42], mouse monoclonal anti-prospéro (1:10, RRID:AB\_528440, [43]), guinea pig polyclonal  
317 anti-senseless (1:1000, [44]), rabbit polyclonal anti-hibris (1:400, AS-14, RRID:AB\_2568633,  
318 [45]). Secondary reagents were obtained from Life Technologies Corporation (Carlsbad, CA)  
319 or Jackson ImmunoResearch Laboratories, Inc. (West Grove, PA). An additional reagent was  
320 prepared from purified (Cell Culture Company, LLC, Minneapolis, MN) mouse monoclonal anti-  
321 Rh3 (RRID:AB\_2315270). anti-Rh3 was directly conjugated using Alexa Fluor™ 647 Protein  
322 Labeling Kit (Invitrogen, catalogue number A20173) and used at 1:100 dilution.  
323 Immunofluorescence images were acquired with an Axioskop plus/AxioCamHRc (Carl Zeiss,  
324 Inc., Thornwood, NY) or by confocal microscopy using a Zeiss Pascal LSM (Carl Zeiss, Inc.) or  
325 Leica TCS SP5 (Leica Microsystems Inc., Buffalo Grove, IL).

326

## 327 **Statistical Analysis**

328 Comparisons of the proportions (percentages) of opsin expression in different genetic  
329 backgrounds were performed with a z-score and are shown in **Table 1** and **Table 2** [46]. The  
330 z-score was calculated using the equation:

$$331 \quad z = \frac{[\rho_2 - \rho_1] - \frac{1}{2}(1/n_1 + 1/n_2)}{\sqrt{\rho_{avg}q_{avg}(1/n_1 + 1/n_2)}}$$

332  $\rho_1$  and  $\rho_2$  = proportions of marker expression in each of the two different genotypes  
333 under comparison.  $n_1$  and  $n_2$  = number of ommatidia counted for each genotype.  $\rho_{avg}$  =  
334 average proportion for both genotypes combined.  $q_{avg} = 1 - \rho_{avg}$ . The significance of the  
335 difference between the two proportions was determined from the normal distribution as a one-  
336 or two-tailed test. The 95% confidence interval of a proportion was calculated using the Wilson  
337 procedure without continuity correction [47, 48] using VassarStats [49].

## 338 **RNA *in situ* hybridization**

339 Eye-antennal imaginal discs from third instar larvae were dissected in PBS, fixed in  
340 50mM EGTA / 4% formaldehyde in PBS, rinsed in methanol, and stored in ethanol at -20°.  
341 Discs were treated with ethanol/xylene (1:1), rinsed with ethanol, post-fixed in 5%  
342 formaldehyde in PBS plus 0.1% Tween (PBT), washed with PBT, and digested with Proteinase  
343 K (5 µg/ml). Tissue was post-fixed again and pre-hybridized in hybridization buffer (50%  
344 deionized formamide, 5XSSC, 1 mg/ml glycogen, 100 µg/ml salmon sperm DNA, 0.1% Tween)  
345 at 48°C. Discs were hybridized overnight at 55°C with 2 µl digoxigenin-labeled antisense RNA  
346 probe in 100 µl hybridization buffer. Probes were prepared from cDNA clones D1 [50],  
347 GH09755 (FBcl0125531), GM02985 (FBcl014202), LD18146 (FBcl0156485), LP09461  
348 (FBcl0187603) of genes *hbs*, *pcs*, *CG10265*, *CG7639* and *ckn*, respectively. The hybridized  
349 imaginal discs were washed extensively with hybridization buffer at 55°C followed by PBT

350 washes at room temperature. Discs were incubated with alkaline phosphatase-conjugated anti-  
351 digoxigenin antibody (1:2000, Roche Applied Science, Indianapolis, IN) overnight at 4°C. Discs  
352 were washed with PBT and gene expression was visualized with staining solution (100mM  
353 NaCl, 50 mM MgCl<sub>2</sub>, 100 mM Tris pH 9.5, 0.1% Tween) containing NBT/BCIP (Roche Applied  
354 Science). Stained imaginal discs were mounted and photographed using an Axioskop  
355 plus/AxioCamHRc (Carl Zeiss Inc.).

### 356 ***Notch* Temperature Sensitivity**

357 Stocks of  $y^1 N^{1N-ts1} g^2 f^1 / C(1)DX$ ,  $y^1 f^1; cn^1 bw^1$  or control  $cn^1 bw^1$  flies were maintained  
358 at 20°C. Male offspring were collected at the white prepuparium stage (P<sub>0</sub>). At 0, 12, 24, 36  
359 and 48-hours after puparium formation (APF), pupae were shifted to 29°C for 12 hours and  
360 returned to 20°C until eclosion or formation of pharate adults. Retinas were dissected and  
361 ommatidia were dissociated and labeled with opsin antibodies for cell counting. 30 pupae were  
362 collected in each experimental or control group.



## 363 Discussion

364 Here we describe the isolation and characterization of a novel allele of the *D.*  
365 *melanogaster* gene *hibris*, an evolutionarily conserved NPHS1 (nephrin) related IgSF member  
366 [51]. We show that *hibris* is required for the coordinated expression of opsin genes in adjacent  
367 R7 and R8 photoreceptor cells within the compound eye. Orthologues of this gene have been  
368 identified in many species, and numerous paralogues within species play diverse roles in  
369 organ system development and function [52]. Within the context of R7 and R8 photoreceptor  
370 cell differentiation and the regulation of opsin gene expression in the retinal mosaic, the  
371 specific functional role of *hbs* is unclear.

372 As noted briefly in the Introduction, the current model for the establishment of paired  
373 opsin gene expression in the R7 and R8 photoreceptors requires the type I activin receptor  
374 *baboon* (*babo*, FBgn0011300), bone morphogenetic protein type 1B receptor *thickveins* (*tkv*,  
375 FBgn0003716), transforming growth factor (TGF) beta type II receptor *punt* (*put*,  
376 FBgn0003169), many of their ligands, ligand processing convertases, and downstream effector  
377 enzymes [21]. In addition, the tumor suppressor kinase *warts* (*wts*, FBgn0011739), *hippo*  
378 kinase (*hpo*, FBgn0261456), *salvador* (*sav*, FBgn0053193), and *melted* (*melt*, FBgn0023001)  
379 a modulator of insulin/PI3K signaling [12], the *hpo* signaling cascade members *Merlin* (*Mer*,  
380 FBgn0086384), *kibra* (*kibra*, FBgn0262127), and the tumor suppressor *lethal (2) giant larvae*  
381 (*l(2)gl*, FBgn0002121) [19], and the transcription factors *ocelliless* (*oc*, FBgn0004102), *dorsal*  
382 *proventriculus* (*dve*, FBgn0020307) [53], *Pvull-Pstl homology 13* (*Pph13*, FBgn0023489) [54]  
383 and *erect wing* (*ewg*, FBgn0005427) [55] are also required. Although not specifically tested in  
384 every case, all of these genes are thought to function cell autonomously within the R7 or R8  
385 photoreceptor cells.

386 *hbs* is required in the eye for the induction of Rh5 expression based upon our  
387 experiments making homozygous mutant clones with *ey3.5-FLP* (**Fig 8**). However, in mosaic

388 animals in which the R7 or R8 cells may be mutant or heterozygous in a mixed genotype  
389 environment, we find that *hbs* appears to have both cell autonomous and non-cell-autonomous  
390 effects. Specifically, ommatidia that carry R7 and R8 cells that are genotypically homozygous  
391 mutant are significantly more likely to show Rh3-Rh6 expression mispairing (**Fig 10C**,  $p < 10^{-15}$ ).  
392 By contrast, in mosaic animals in which both the R7 and R8 cell of an individual ommatidium  
393 are heterozygous or homozygous wildtype, there is still a substantial reduction in Rh5  
394 expression in R8 cells and a statistically significant (**Fig 10C**,  $p = 5.2 \times 10^{-9}$ ) increase in Rh3-Rh6  
395 expression mispairing. This reflects a classic non-cell autonomous effect.

396 What could that effect be? Traditionally inductive processes are thought to occur  
397 between tissues or cells in which there is an inducer and a responder. Inductive signals are  
398 also often defined as instructive or permissive [56]. In the presence of an instructive interaction  
399 (i.e. from a pR7 cell), the responder (R8) develops in a certain way (as a pR8 cell expressing  
400 Rh5). By contrast, in the absence of the instructive interaction (yR7 or R7 cells absent, e.g.  
401 *severeless* (*sev*) mutants), the responder (R8) does not develop in a certain way (does not  
402 become pR8 expressing Rh5, but rather becomes yR8 and expresses Rh6 instead as a default  
403 fate (with some exceptions [11]). If *hbs* played a formal instructive role in regulating the  
404 expression of Rh5 in R8 photoreceptor cells, then we would expect that its expression  
405 throughout the retina (*GMR-Gal4; UAS-hbs*) would lead to expression of Rh5 in all R8  
406 photoreceptor cells even in the absence of R7 cells (Fig 9B). While the number of R8 cells  
407 expressing Rh5 is far higher than in *sev* mutants alone [10, 11, 22, 23], ectopic expression of  
408 *hbs* in this experiment is not sufficient to induce Rh5 expression in all R8 photoreceptor cells.  
409 Therefore, *hbs* does not play a strictly instructive role in this process.

410 As a potentially permissive regulator of R8 photoreceptor cell differentiation, *hbs* may  
411 play a role in establishing the architecture of the developing eye. Perhaps loss of *hbs* in  
412 mosaic or fully mutant animals disrupts cellular contacts that mediate signaling between R7  
413 and R8. There is ample evidence for disruption of cone and pigment cell differentiation and eye

414 roughening in *hbs* mutants [57, 58]. Furthermore, *hbs* and its binding partner *roughest* (*rst*) are  
415 known to have effects on axon guidance and synapse formation in the optic lobes [59-62].  
416 Perhaps interactions within the lamina or medulla are responsible for some aspect of inductive  
417 signaling and expression of Rh5 in pR8. Finally, perhaps the loss of Rh5 expression in the *hbs*  
418 mutant eye reflects an inability to respond to the inductive signal, a loss of competence [63].  
419 We previously suggested that *rhomboid* (*rho*, FBgn000463) and the *Epidermal growth factor*  
420 *receptor* (*Egfr*, FBgn0003731) may play a role in establishing competence of the R8 cell [22].  
421 In these studies, we showed that *rho* is required for the induction of Rh5 expression in R8  
422 photoreceptor cells, but like *hbs*, when *rho* is lost in mosaic retinas but the R7 and R8 cells of  
423 an individual ommatidia are wild type or heterozygous, there remains a dramatic effect on  
424 induction of Rh5 expression. Furthermore, loss of *Egfr* was also found to reduce the induction  
425 of Rh5 expression and also affect the proportion of pR7 and yR7 cells. These findings suggest  
426 that *hbs* likely plays a permissive, non-cell autonomous role in R7 and R8 differentiation.

427         Because *hbs* is both regulated by *N* signaling [50] and also thought to participate in *N*  
428 processing following its activation [28], our finding that *N* is also required for induction of Rh5  
429 expression is not unexpected. This result is completely consistent with the previous findings  
430 that sequential loss of *N* signaling disrupted eye development and differentiation at every time  
431 point [34]. Similarly, alterations in *N* signaling also affect the proportion of pR7 and yR7 cells,  
432 suggesting that it as well as *Egfr* may regulate what is thought to be a cell-autonomous  
433 stochastic developmental process. These findings raise several notes of caution regarding the  
434 potential complexity of the system and the need to rigorously test the underlying hypotheses  
435 upon which the current model for R7 and R8 photoreceptor cell differentiation is based.

436         Subsequent analysis of the role of *hbs* in R7 and R8 photoreceptor cell differentiation  
437 will require further identification of its specific interaction partners in this system, either in the  
438 retina or optic lobes, as well as the temporal requirement for its involvement in R7 and R8 cell  
439 differentiation. Ample resources are available including available mutant strains [64], RNAi

440 transgenics [65], and temporal and spatial mis-expression tools [66-70]. Despite these  
441 technical resources, defining the precise role of *hbs* in R7 and R8 differentiation will likely yield  
442 a complex system, reflecting coregulation of the IRM proteins [71], involvement of large  
443 complexes associated with scaffolding proteins [72], functional or genetic redundancy,  
444 compensation [73] and feedback.

445

446 **Acknowledgements**

447 We thank Mary Baylies, Ruben Artero, Gerry Rubin, Amy Tang, James Mohler, and Jeff  
448 Sekelsky for *D. melanogaster* stocks, Mary Baylies for the *hbs* D1 cDNA clone, Karl Fischbach  
449 for the rabbit anti-*hbs* antibody (AS-14), and Hugo Bellen for the guinea pig anti-sens antibody.  
450 Stocks obtained from the Bloomington Drosophila Stock Center (NIH P40OD018537) were  
451 also used in this study. We thank Natalia Toledo Melendez for technical assistance, John  
452 Aldrich and Tom Jacobsen for comments on the manuscript and thoughtful discussion.

453

## References

- 455 1. Nathans J, Thomas D, Hogness DS. Molecular genetics of human color vision: the genes  
456 encoding blue, green, and red pigments. *Science*. 1986;232(4747):193-202. PubMed PMID:  
457 2937147.
- 458 2. Jacobs GH. Comparative color vision. Carterette EC, Friedman MP, editors. New York:  
459 Academic Press; 1981.
- 460 3. Wikler KC, Rakic P. Distribution of photoreceptor subtypes in the retina of diurnal and  
461 nocturnal primates. *J Neurosci*. 1990;10(10):3390-401. PubMed PMID: 2145402.
- 462 4. Viets K, Eldred KC, Johnston RJ, Jr. Mechanisms of Photoreceptor Patterning in Vertebrates  
463 and Invertebrates. *Trends Genet*. 2016;32(10):638-59. doi: 10.1016/j.tig.2016.07.004. PubMed  
464 PMID: 27615122; PubMed Central PMCID: PMC5035628.
- 465 5. Quinn WG, Harris WA, Benzer S. Conditioned behavior in *Drosophila melanogaster*. *Proc Natl*  
466 *Acad Sci U S A*. 1974;71(3):708-12.
- 467 6. Spatz HC, Emanns A, Reichert H. Associative learning of *Drosophila melanogaster*. *Nature*.  
468 1974;248(446):359-61.
- 469 7. Tang S, Guo A. Choice behavior of *Drosophila* facing contradictory visual cues. *Science*.  
470 2001;294(5546):1543-7.
- 471 8. Cook T, Pichaud F, Sonnevile R, Papatsenko D, Desplan C. Distinction between color  
472 photoreceptor cell fates is controlled by Prospero in *Drosophila*. *Dev Cell*. 2003;4(6):853-64.  
473 PubMed PMID: 12791270.
- 474 9. Wernet MF, Labhart T, Baumann F, Mazzone EO, Pichaud F, Desplan C. Homothorax switches  
475 function of *Drosophila* photoreceptors from color to polarized light sensors. *Cell*.  
476 2003;115(3):267-79. PubMed PMID: 14636555.
- 477 10. Chou WH, Hall KJ, Wilson DB, Wideman CL, Townson SM, Chadwell LV, et al. Identification of  
478 a novel *Drosophila* opsin reveals specific patterning of the R7 and R8 photoreceptor cells.  
479 *Neuron*. 1996;17(6):1101-15.
- 480 11. Chou WH, Huber A, Bentrop J, Schulz S, Schwab K, Chadwell LV, et al. Patterning of the R7  
481 and R8 photoreceptor cells of *Drosophila*: evidence for induced and default cell-fate  
482 specification. *Development*. 1999;126(4):607-16.
- 483 12. Mikeladze-Dvali T, Wernet MF, Pistillo D, Mazzone EO, Teleman AA, Chen YW, et al. The  
484 Growth Regulators *warts/lats* and *melted* Interact in a Bistable Loop to Specify Opposite Fates  
485 in *Drosophila* R8 Photoreceptors. *Cell*. 2005;122(5):775-87. PubMed PMID: 16143107.
- 486 13. Fortini ME, Rubin GM. The optic lobe projection pattern of polarization-sensitive photoreceptor  
487 cells in *Drosophila melanogaster*. *Cell Tissue Res*. 1991;265(1):185-91.
- 488 14. Yamaguchi S, Desplan C, Heisenberg M. Contribution of photoreceptor subtypes to spectral  
489 wavelength preference in *Drosophila*. *Proc Natl Acad Sci U S A*. 2010;107(12):5634-9. Epub  
490 2010/03/10. doi: 0809398107 [pii]10.1073/pnas.0809398107. PubMed PMID: 20212139;  
491 PubMed Central PMCID: PMC2851746.
- 492 15. Kirschfeld K, Feiler R, Franceschini N. A photostable pigment within the rhabdomeres of fly  
493 photoreceptors no. 7. *J Comp Physiol*. 1978;125:275-84.
- 494 16. Franceschini N, Kirschfeld K, Minke B. Fluorescence of photoreceptor cells observed in vivo.  
495 *Science*. 1981;213(4513):1264-7.
- 496 17. Papatsenko D, Sheng G, Desplan C. A new rhodopsin in R8 photoreceptors of *Drosophila*:  
497 evidence for coordinate expression with Rh3 in R7 cells. *Development*. 1997;124(9):1665-73.
- 498 18. Wernet MF, Mazzone EO, Celik A, Duncan DM, Duncan I, Desplan C. Stochastic spineless  
499 expression creates the retinal mosaic for colour vision. *Nature*. 2006;440(7081):174-80.  
500 PubMed PMID: 16525464.
- 501 19. Jukam D, Desplan C. Binary regulation of Hippo pathway by Merlin/NF2, Kibra, Lgl, and  
502 Melted specifies and maintains postmitotic neuronal fate. *Dev Cell*. 2011;21(5):874-87. Epub

- 503 2011/11/08. doi: 10.1016/j.devcel.2011.10.004. PubMed PMID: 22055343; PubMed Central  
504 PMCID: PMC3215849.
- 505 20. Jukam D, Xie B, Rister J, Terrell D, Charlton-Perkins M, Pistillo D, et al. Opposite feedbacks in  
506 the Hippo pathway for growth control and neural fate. *Science*. 2013;342(6155):1238016. doi:  
507 10.1126/science.1238016. PubMed PMID: 23989952; PubMed Central PMCID: PMC3796000.
- 508 21. Wells BS, Pistillo D, Barnhart E, Desplan C. Parallel activin and BMP signaling coordinates  
509 R7/R8 photoreceptor subtype pairing in the stochastic *Drosophila* retina. *Elife*. 2017;6. doi:  
510 10.7554/eLife.25301. PubMed PMID: 28853393.
- 511 22. Birkholz DA, Chou WH, Phistry MM, Britt SG. rhomboid mediates specification of blue- and  
512 green-sensitive R8 photoreceptor cells in *Drosophila*. *J Neurosci*. 2009a;29(9):2666-75. Epub  
513 2009/03/06. doi: 10.1523/JNEUROSCI.5988-08.2009. PubMed PMID: 19261861; PubMed  
514 Central PMCID: PMC2679528.
- 515 23. Birkholz DA, Chou WH, Phistry MM, Britt SG. Disruption of photoreceptor cell patterning in the  
516 *Drosophila* Scutoid mutant. *Fly (Austin)*. 2009b;3(4):253-62. Epub 2009/12/02. doi: 10546 [pii].  
517 PubMed PMID: 19949290; PubMed Central PMCID: PMC2836898.
- 518 24. Fischbach KF, Linneweber GA, Andlauer TF, Hertenstein A, Bonengel B, Chaudhary K. The  
519 irre cell recognition module (IRM) proteins. *J Neurogenet*. 2009;23(1):48-67. Epub 2009/01/10.  
520 doi: 907468657 [pii]10.1080/01677060802471668. PubMed PMID: 19132596.
- 521 25. Callahan CA, Thomas JB. Tau-beta-galactosidase, an axon-targeted fusion protein. *Proc Natl*  
522 *Acad Sci U S A*. 1994;91(13):5972-6.
- 523 26. Hummel T, Klambt C. P-element mutagenesis. *Methods Mol Biol*. 2008;420:97-117. Epub  
524 2008/07/22. doi: 10.1007/978-1-59745-583-1\_6. PubMed PMID: 18641943.
- 525 27. Dworak HA, Charles MA, Pellerano LB, Sink H. Characterization of *Drosophila* hibris, a gene  
526 related to human nephrin. *Development*. 2001;128(21):4265-76. PubMed PMID: 11684662.
- 527 28. Singh J, Mlodzik M. Hibris, a *Drosophila* Nephrin Homolog, Is Required for Presenilin-Mediated  
528 Notch and APP-like Cleavages. *Dev Cell*. 2012;23(1):82-96. Epub 2012/07/21. doi:  
529 10.1016/j.devcel.2012.04.021. PubMed PMID: 22814602.
- 530 29. Newsome TP, Asling B, Dickson BJ. Analysis of *Drosophila* photoreceptor axon guidance in  
531 eye-specific mosaics. *Development*. 2000;127(4):851-60. PubMed PMID: 10648243.
- 532 30. Grillo-Hill BK, Wolff T. Dynamic cell shapes and contacts in the developing *Drosophila* retina  
533 are regulated by the Ig cell adhesion protein hibris. *Dev Dyn*. 2009;238(9):2223-34. Epub  
534 2009/06/09. doi: 10.1002/dvdy.21981. PubMed PMID: 19504462.
- 535 31. Bazigou E, Apitz H, Johansson J, Loren CE, Hirst EM, Chen PL, et al. Anterograde Jelly belly  
536 and Alk receptor tyrosine kinase signaling mediates retinal axon targeting in *Drosophila*. *Cell*.  
537 2007;128(5):961-75. Epub 2007/03/14. doi: S0092-8674(07)00248-6 [pii]  
538 10.1016/j.cell.2007.02.024. PubMed PMID: 17350579.
- 539 32. Brand AH, Perrimon N. Targeted gene expression as a means of altering cell fates and  
540 generating dominant phenotypes. *Development*. 1993;118(2):401-15. PubMed PMID:  
541 8223268.
- 542 33. Chang HC, Newmyer SL, Hull MJ, Ebersold M, Schmid SL, Mellman I. Hsc70 is required for  
543 endocytosis and clathrin function in *Drosophila*. *J Cell Biol*. 2002;159(3):477-87. Epub  
544 2002/11/13. doi: 10.1083/jcb.200205086. PubMed PMID: 12427870; PubMed Central PMCID:  
545 PMC2173062.
- 546 34. Cagan RL, Ready DF. Notch is required for successive cell decisions in the developing  
547 *Drosophila* retina. *Genes Dev*. 1989;3(8):1099-112. PubMed PMID: 2792755.
- 548 35. Artero R, Furlong EE, Beckett K, Scott MP, Baylies M. Notch and Ras signaling pathway  
549 effector genes expressed in fusion competent and founder cells during *Drosophila*  
550 myogenesis. *Development*. 2003;130(25):6257-72. PubMed PMID: 14602676.
- 551 36. Gildor B, Schejter ED, Shilo BZ. Bidirectional Notch activation represses fusion competence in  
552 swarming adult *Drosophila* myoblasts. *Development*. 2012;139(21):4040-50. doi:  
553 10.1242/dev.077495. PubMed PMID: 23048185.

- 554 37. Bao S. Notch controls cell adhesion in the *Drosophila* eye. *PLoS Genet.* 2014;10(1):e1004087.  
555 doi: 10.1371/journal.pgen.1004087. PubMed PMID: 24415957; PubMed Central PMCID:  
556 PMC3886913.
- 557 38. Center BDS. BDSC Cornmeal Food 2017 [cited 2018 April 26]. Available from:  
558 <https://bdsc.indiana.edu/information/recipes/bloomfood.html>.
- 559 39. Greenspan RJ. Fly pushing : the theory and practice of *Drosophila* genetics. 2nd ed. Cold  
560 Spring Harbor, N.Y.: Cold Spring Harbor Laboratory Press; 2004. xiv, 191 p. p.
- 561 40. Roberts DB. *Drosophila* : a practical approach. 2nd ed. Oxford, [Eng.] ; New York: IRL Press at  
562 Oxford University Press; 1998. xxiv, 389 p. p.
- 563 41. Ashburner M. *Drosophila*. Cold Spring Harbor, N.Y.: Cold Spring Harbor Laboratory; 1989.
- 564 42. Earl JB, Britt SG. Expression of *Drosophila* rhodopsins during photoreceptor cell differentiation:  
565 Insights into R7 and R8 cell subtype commitment. *Gene Expr Patterns.* 2006;6(7):687-94.  
566 PubMed PMID: 16495161.
- 567 43. Campbell G, Goring H, Lin T, Spana E, Andersson S, Doe CQ, et al. RK2, a glial-specific  
568 homeodomain protein required for embryonic nerve cord condensation and viability in  
569 *Drosophila*. *Development.* 1994;120(10):2957-66. PubMed PMID: 7607085.
- 570 44. Nolo R, Abbott LA, Bellen HJ. Senseless, a Zn finger transcription factor, is necessary and  
571 sufficient for sensory organ development in *Drosophila*. *Cell.* 2000;102(3):349-62. Epub  
572 2000/09/07. PubMed PMID: 10975525.
- 573 45. Linneweber GA, Winking M, Fischbach KF. The Cell Adhesion Molecules Roughest, Hibris, Kin  
574 of Irre and Sticks and Stones Are Required for Long Range Spacing of the *Drosophila* Wing  
575 Disc Sensory Sensilla. *PLoS One.* 2015;10(6):e0128490. doi: 10.1371/journal.pone.0128490.  
576 PubMed PMID: 26053791; PubMed Central PMCID: PMC4459997.
- 577 46. Fleiss JL, Levin BA, Paik MC. Statistical methods for rates and proportions. 3rd / ed. Hoboken,  
578 N.J.: Wiley-Interscience; 2003. xxvii, 760 p.
- 579 47. Newcombe RG. Two-sided confidence intervals for the single proportion: comparison of seven  
580 methods. *Stat Med.* 1998;17(8):857-72. Epub 1998/05/22. PubMed PMID: 9595616.
- 581 48. Wilson EB. Probable Inference, the Law of Succession, and Statistical Inference. *Journal of*  
582 *the American Statistical Association.* 1927;22(158):209-12. doi: 10.2307/2276774.
- 583 49. Lowry R. VassarStats: Website for Statistical Computation. 2018 [cited 2018 07/31/2018]. The  
584 Confidence Interval of a Proportion.]. Available from: <http://vassarstats.net/prop1.html>.
- 585 50. Artero RD, Castanon I, Baylies MK. The immunoglobulin-like protein Hibris functions as a  
586 dose-dependent regulator of myoblast fusion and is differentially controlled by Ras and Notch  
587 signaling. *Development.* 2001;128(21):4251-64. PubMed PMID: 11684661.
- 588 51. Kestila M, Lenkkeri U, Mannikko M, Lamerdin J, McCready P, Putaala H, et al. Positionally  
589 cloned gene for a novel glomerular protein--nephrin--is mutated in congenital nephrotic  
590 syndrome. *Mol Cell.* 1998;1(4):575-82. PubMed PMID: 9660941.
- 591 52. Helmstadter M, Hohne M, Huber TB. A brief overview on IRM function across evolution. *J*  
592 *Neurogenet.* 2014;28(3-4):264-9. doi: 10.3109/01677063.2014.918976. PubMed PMID:  
593 24912528.
- 594 53. Johnston RJ, Jr., Otake Y, Sood P, Vogt N, Behnia R, Vasiliauskas D, et al. Interlocked  
595 feedforward loops control cell-type-specific Rhodopsin expression in the *Drosophila* eye. *Cell.*  
596 2011;145(6):956-68. Epub 2011/06/15. doi: 10.1016/j.cell.2011.05.003. PubMed PMID:  
597 21663797; PubMed Central PMCID: PMC3117217.
- 598 54. Mishra M, Oke A, Lebel C, McDonald EC, Plummer Z, Cook TA, et al. Pph13 and orthodenticle  
599 define a dual regulatory pathway for photoreceptor cell morphogenesis and function.  
600 *Development.* 2010;137(17):2895-904. doi: 10.1242/dev.051722. PubMed PMID: 20667913;  
601 PubMed Central PMCID: PMC3117217.
- 602 55. Hsiao HY, Jukam D, Johnston R, Desplan C. The neuronal transcription factor erect wing  
603 regulates specification and maintenance of *Drosophila* R8 photoreceptor subtypes. *Dev Biol.*



- 604 2013;381(2):482-90. doi: 10.1016/j.ydbio.2013.07.001. PubMed PMID: 23850772; PubMed  
605 Central PMCID: PMC3757101.
- 606 56. Holtzer H. Induction of chondrogenesis: A concept in terms of mechanisms. In: Fleischmajer R,  
607 Billingham RE, editors. Epithelial-Mesenchymal Interactions. Baltimore, MD: Williams &  
608 Wilkins; 1968. p. 152-64.
- 609 57. Bao S, Cagan R. Preferential adhesion mediated by Hibris and Roughest regulates  
610 morphogenesis and patterning in the Drosophila eye. Dev Cell. 2005;8(6):925-35. PubMed  
611 PMID: 15935781.
- 612 58. Bao S, Fischbach KF, Corbin V, Cagan RL. Preferential adhesion maintains separation of  
613 ommatidia in the Drosophila eye. Dev Biol. 2010;344(2):948-56. Epub 2010/07/06. doi: S0012-  
614 1606(10)00833-X [pii]10.1016/j.ydbio.2010.06.013. PubMed PMID: 20599904; PubMed  
615 Central PMCID: PMC2921583.
- 616 59. Sugie A, Umetsu D, Yasugi T, Fischbach KF, Tabata T. Recognition of pre- and postsynaptic  
617 neurons via nephrin/NEPH1 homologs is a basis for the formation of the Drosophila retinotopic  
618 map. Development. 2010;137(19):3303-13. Epub 2010/08/21. doi: dev.047332  
619 [pii]10.1242/dev.047332. PubMed PMID: 20724453.
- 620 60. Boschert U, Ramos RG, Tix S, Technau GM, Fischbach KF. Genetic and developmental  
621 analysis of irreC, a genetic function required for optic chiasm formation in Drosophila. J  
622 Neurogenet. 1990;6(3):153-71. Epub 1990/04/01. PubMed PMID: 2358965.
- 623 61. Ramos RG, Igloi GL, Lichte B, Baumann U, Maier D, Schneider T, et al. The irregular chiasm  
624 C-roughest locus of Drosophila, which affects axonal projections and programmed cell death,  
625 encodes a novel immunoglobulin-like protein. Genes Dev. 1993;7(12B):2533-47. PubMed  
626 PMID: 7503814.
- 627 62. Schneider T, Reiter C, Eule E, Bader B, Lichte B, Nie Z, et al. Restricted expression of the  
628 irreC-rst protein is required for normal axonal projections of columnar visual neurons. Neuron.  
629 1995;15(2):259-71. PubMed PMID: 7646884.
- 630 63. Waddington CH. Organisers & genes. Cambridge Eng.: The University Press; 1940. x p., 1 l.,  
631 160 p. incl. front., illus., diagrs. p.
- 632 64. Gramates LS, Marygold SJ, Santos GD, Urbano JM, Antonazzo G, Matthews BB, et al.  
633 FlyBase at 25: looking to the future. Nucleic Acids Res. 2017;45(D1):D663-D71. doi:  
634 10.1093/nar/gkw1016. PubMed PMID: 27799470; PubMed Central PMCID:  
635 PMC5210523.
- 636 65. Dietzl G, Chen D, Schnorrer F, Su KC, Barinova Y, Fellner M, et al. A genome-wide transgenic  
637 RNAi library for conditional gene inactivation in Drosophila. Nature. 2007;448(7150):151-6.  
638 Epub 2007/07/13. doi: nature05954 [pii]10.1038/nature05954. PubMed PMID: 17625558.
- 639 66. Brand AH, Dormand EL. The GAL4 system as a tool for unravelling the mysteries of the  
640 Drosophila nervous system. Curr Opin Neurobiol. 1995;5(5):572-8. PubMed PMID: 8580708.
- 641 67. Bello B, Resendez-Perez D, Gehring WJ. Spatial and temporal targeting of gene expression in  
642 Drosophila by means of a tetracycline-dependent transactivator system. Development.  
643 1998;125(12):2193-202. PubMed PMID: 9584119.
- 644 68. Roman G, Endo K, Zong L, Davis RL. P[Switch], a system for spatial and temporal control of  
645 gene expression in Drosophila melanogaster. Proc Natl Acad Sci U S A. 2001;98(22):12602-7.  
646 PubMed PMID: 11675496.
- 647 69. McGuire SE, Mao Z, Davis RL. Spatiotemporal gene expression targeting with the TARGET  
648 and gene-switch systems in Drosophila. Sci STKE. 2004;2004(220):pl6. PubMed PMID:  
649 14970377.
- 650 70. Sun J, Tower J. FLP recombinase-mediated induction of Cu/Zn-superoxide dismutase  
651 transgene expression can extend the life span of adult Drosophila melanogaster flies. Mol Cell  
652 Biol. 1999;19(1):216-28. PubMed PMID: 9858546; PubMed Central PMCID: PMC83880.

- 653 71. Machado MCR, Valer FB, Couto-Lima CA, Ramos RGP. Transcriptional cross-regulation of  
654 Irre Cell Recognition Module (IRM) members in the Drosophila pupal retina. *Mech Dev.* 2018.  
655 Epub 2018/07/22. doi: 10.1016/j.mod.2018.07.006. PubMed PMID: 30030087.
- 656 72. Ni J, Bao S, Johnson RI, Zhu B, Li J, Vadaparampil J, et al. MAGI-1 Interacts with Nephrin to  
657 Maintain Slit Diaphragm Structure through Enhanced Rap1 Activation in Podocytes. *J Biol*  
658 *Chem.* 2016;291(47):24406-17. Epub 2016/10/21. doi: 10.1074/jbc.M116.745026. PubMed  
659 PMID: 27707879; PubMed Central PMCID: PMC5114397.
- 660 73. El-Brolosy MA, Stainier DYR. Genetic compensation: A phenomenon in search of  
661 mechanisms. *PLoS Genet.* 2017;13(7):e1006780. Epub 2017/07/14. doi:  
662 10.1371/journal.pgen.1006780. PubMed PMID: 28704371; PubMed Central PMCID:  
663 PMC5509088.
- 664 74. Bridges CB. SALIVARY CHROMOSOME MAPS: With a Key to the Banding of the  
665 Chromosomes of *Drosophila Melanogaster*. *Journal of Heredity.* 1935;26(2):60-4. doi:  
666 10.1093/oxfordjournals.jhered.a104022.  
667

## 668 **Figure Legends**

669 **Fig 1. Diagram of photoreceptor cell organization and opsin gene expression.** Two  
670 ommatidia are shown consisting of gray cylinders corresponding to the rhabdomeres of the  
671 R1-6 photoreceptor cells. These surround the central rhabdomeres of the R7 and R8 cells.  
672 Expression of opsin genes within the R7 cells (*Rh3* in magenta or *Rh4* in yellow) is paired with  
673 opsin gene expression in the adjacent R8 cell (*Rh5* in blue or *Rh6* in green) in pale and yellow  
674 ommatidia, respectively.

675 **Fig 2. *a69* mutants have a defect in *Rh5* and *Rh6* expression in R8 photoreceptor cells.**  
676 White eyed wild type flies (*w<sup>1118</sup>*) express *Rh5* and *Rh6* in a proportion of approximately 1:2,  
677 this is shown in a longitudinal section of the retina (A) as well as in dissociated ommatidia (B).  
678 (C) *w<sup>1118</sup>* flies express *Rh4* and *Rh6* in a paired fashion. The arrowheads indicate *Rh3*  
679 expressing R7 cells that do not normally pair with *Rh6* expressing R8 cells. *w<sup>1118</sup>; P{etau-*  
680 *lacZ}a69* mutants show a disruption in *Rh5* expression, with a substantial decrease in *Rh5*  
681 expression shown in both section (D) and dissociated ommatidia (E) as well as prominent  
682 mispairing between *Rh3* expressing R7 cells and *Rh6* expressing R8 cells in the same  
683 ommatidia (arrowheads).

684 **Fig 3. Recombination mapping of *a69* to the second chromosome between *pr* and *c*.**  
685 Three multiply marked chromosomes (*al<sup>1</sup> dpy<sup>ov1</sup> b<sup>1</sup> pr<sup>1</sup> c<sup>1</sup> px<sup>1</sup> sp<sup>1</sup>*, *al<sup>1</sup> dpy<sup>ov1</sup> b<sup>1</sup> pr<sup>1</sup>*, and *b<sup>1</sup> pr<sup>1</sup>*  
686 *c<sup>1</sup> px<sup>1</sup> sp<sup>1</sup>*) were recombined with the *w<sup>1118</sup>; P{etau-lacZ}a69* mutant. After marker  
687 identification, recombinant strains were back crossed to the *a69* mutant and scored for the  
688 percentage of *Rh5* expression. The regions of the recombinant chromosomes assumed to be  
689 derived from the *a69* parental mutant strain are indicated in gray, while the regions assumed to  
690 be derived from the multiple marked (wild-type) chromosomes are black. Sixteen recombinant  
691 strains were phenotypically wild-type and complemented *a69*. Four recombinant strains were  
692 intermediate and eight strains were mutant and failed to complement *a69*. The four

693 intermediate strains and one wild type strain, *a110*, differed from the expected phenotypes and  
694 may have resulted from multiple recombination events or exposure of cryptic modifier loci. See  
695 **S1 Table**. Complementation of *a69* Recombinant Strains.

696 **Fig 4. Cytogenetic Map, Molecular Map and Deficiency Complementation of *a69*.** The top  
697 panel shows the cytogenetic map of the 51 region of chromosome 2R [74], used with  
698 permission. Diagramed below are the deleted regions of deficiency strains tested, the  
699 corresponding molecular map and identified protein coding genes in the region. Arrows or  
700 arrowheads indicate the orientation of gene transcription and arrow or arrowhead length  
701 corresponds to gene length at the scale indicated (K, kilobase). Data obtained from Flybase  
702 version FB2018\_01 [64].

703 **Fig 5. *In situ* Hybridization of *a69* Candidate Genes.** The figures shows *in situ* hybridization  
704 of biotinylated reverse strand probes prepared from *hibris*, *parcas*, *CG10265*, *CG7639*, and  
705 *caskin* cDNA clones (rows) against wild type (*cn<sup>1</sup> bw<sup>1</sup>*) (left column) or *a69* mutant (right  
706 column) eye-antennal imaginal discs.

707 **Fig 6. *hibris* Expression in the Third Instar Larval Eye Imaginal Disc.** The figure shows a  
708 confocal microscopy flattened Z-stack series of *hibris* (*hbs*) immunolabeling (A) and triple  
709 labeling of the same wild type (*cn<sup>1</sup> bw<sup>1</sup>*) specimen with antibodies against *hbs*, *senseless*  
710 (*sens*) and *prospero* (*pros*) (B). The morphogenetic furrow has moved from right (posterior) to  
711 left (anterior).

712 **Fig 7. Opsin Expression in *hbs*<sup>1130</sup> Mosaic Mutant Retina.** Large FLP-FRT retinal clones  
713 were generated in the eye and optic lobes with *ey-FLP*. Panel A shows a bright field  
714 microscopy image of a single heterozygous clone (red tissue marked with *w<sup>+</sup>*) within an  
715 otherwise homozygous *hbs*<sup>1130</sup> mutant retina (white tissue). B and C show one R8  
716 photoreceptor cell expressing *Rh5* in this heterozygous clone, whereas elsewhere in the retina,  
717 only *Rh6* is expressed in R8 photoreceptor cells. Frequent mispairing of *Rh3* expressing R7  
718 cells and *Rh6* expressing R8 cells is also shown. *Rh3* (blue), *Rh5* (red) and *Rh6* (green)

719 expression were detected by confocal microscopy with directly labeled monoclonal antibodies  
720 as described in **Materials and Methods**.

721 **Fig 8. Opsin Expression in *hbs*<sup>66</sup> Mutant and Wildtype Control Flies.** Large FLP-FRT  
722 retinal clones were generated in the eye and optic lobes with *ey-FLP*, panels A and B, or in the  
723 retina alone with *ey3.5-FLP*. Homozygous *hbs*<sup>66</sup> mutant clones are shown in panels A and C.  
724 Homozygous wild-type control clones (+) are shown in panels B and D. Heterozygous tissue is  
725 marked with *w*<sup>+</sup> and outlined in panels B, C and D. *Rh3* (blue), *Rh5* (red) and *Rh6* (green)  
726 expression were detected by confocal microscopy with directly labeled monoclonal antibodies  
727 as described in **Materials and Methods**.

728 **Fig 9. Overexpression of *hibris* Induces Increased *Rh5* Expression.** Over expression of  
729 *UAS-hbs* with the *GMR-GAL4* driver leads to an increase in *Rh5* (red) expression, panel A.  
730 Removal of R7 photoreceptor cells (*sevenless*<sup>14</sup> mutation) partially suppresses the effect,  
731 panel B. *Rh6* expression is shown in green.

732 **Fig 10. Testing for an R7 and/or R8 Cell Autonomous Requirement for *hibris*.** Clusters of  
733 dissociated ommatidia from the eyes of *hbs*<sup>66</sup> flies carrying small homozygous mutant clones  
734 were examined for expression of *Rh3* (yellow), *Rh4* (red), *Rh5* (blue), *Rh6* (magenta) panel A,  
735 and *myr.GFP* (green, panel B). Heterozygous or homozygous wild-type tissue is labeled with a  
736 myristoylated, membrane associated GFP (*myr.GFP*) (green, panel B, labeled R7+ or R8+ in  
737 panel C). Homozygous mutant tissue is unlabeled for *myr.GFP* (labeled R7- or R8- in panel C).  
738 Asterisks in panels A and B indicate two ommatidia showing *myr.GFP* expression in R7, R8  
739 and other (in the case of the left ommatidia in panel B) photoreceptor cells. Panel C shows the  
740 percentage of mispairing of Rh3-Rh6 expressing R7-R8 cells in individual ommatidia (Y-axis)  
741 for unrecombined *cn bw* control flies, and each genotype of R7/R8 photoreceptor cells (X-  
742 axis). Asterisks (\*) in panel C indicate that Rh3-Rh6 expression mispairing is significantly  
743 different statistically from the *cn bw* control (n=96 ommatidia) for R7+ R8+ ( $p=5.2 \times 10^{-9}$ , n=170  
744 ommatidia), R7- R8+ ( $p=1.6 \times 10^{-6}$ , n=11), R7+ R8- ( $p=5.0 \times 10^{-5}$ , n=6), R7- R8- ( $p < 10^{-15}$ , n=178).

745 Hashtag (#) in Panel C indicates mispairing is significantly different statistically from R7+ R8+  
746 for R7- R8- ( $p < 10^{-15}$ ,  $n = 178$ ). Error bars indicate the 95% confidence intervals for the  
747 measured percentages.

748 **Fig 11. Analysis of *Notch* Function in R7 and R8 Photoreceptor Cell Differentiation.**  $N^{1N-}$   
749  $ts^1$ ;  $cn^1 bw^1$  (shaded columns) flies were compared to  $cn^1 bw^1$  control (white columns) flies.  
750 Panel A shows data for the percent of R7 cells expressing Rh3 versus Rh4. Panel B shows  
751 data for the percent of Rh3-Rh6 mispairing in adjacent R7 and R8 photoreceptor cells within  
752 an individual ommatidium. Both panels A and B are bar graphs showing no temperature shift  
753 (none, raised continuously at 20°C) or a 12 hour temperature shift (temperature raised to 29°C  
754 at the indicated time in hours after puparium formation (APF) followed by return to 20°C).  
755 Hashtag (#) indicates significantly different from  $cn bw$  control receiving the same treatment  
756  $p < 0.05$ . Asterisk (\*) indicates significantly different from the same genotype not heat shocked  
757 (none)  $p < 0.05$ . + not recovered (heat shock induced lethality was observed for  $cn bw$  at this  
758 temperature shift time point). Error bars indicate the 95% confidence intervals for the  
759 measured percentages. Number of ommatidia counted for  $cn bw$  and  $N$ ;  $cn bw$  respectively  
760 Panel A (no heat shock 259, 446; 0-12 hr heat shock 505, 411; 12-24 hr heat shock 0, 226; 24-  
761 36 hr heat shock 285, 306; 36-48 hr heat shock 509, 577; 48-60 hr heat shock 610, 586).  
762 Panel B (no heat shock 96, 232; 0-12 hr heat shock 197, 234; 12-24 hr heat shock 0, 104; 24-  
763 36 hr heat shock 103, 187; 36-48 hr heat shock 183, 231; 48-60 hr heat shock 232, 316).

764

## 765 **Supporting Information**

766 **S1 Table. Complementation of a69 Recombinant Strains.** Recombinants described in Fig 3  
767 were crossed to a69 and the number of ommatidia counted expressing Rh5 or Rh6, Total  
768 counted, and % Rh5 are indicated in the table. Controls for comparison were homozygous a69  
769 mutants or a69 / w<sup>1118</sup> heterozygotes. Each recombinant strain was compared to both controls  
770 (right two columns) and was either not significantly different (NSD) or significantly different  
771 from (SDF) the indicated control at the *p* value stated. Statistical comparisons of strains were  
772 carried out as described in Materials and Methods. Controls are indicated at the bottom of the  
773 table. Recombinant strains having % Rh5 values intermediate between wild type and mutant  
774 phenotypes, but statistically significantly different from both, are shaded.

775 **S2 Table. Complementation of a69 by Deficiency Strains.** A panel of thirty three deficiency  
776 stains were crossed to a69 to test for complementation. The number of ommatidia counted  
777 expressing Rh5 or Rh6, Total counted, and % Rh5 are indicated in the table. The control for  
778 comparison was homozygous a69 mutants. Compared to a69 (right column) each deficiency  
779 over a69 was either not significantly different (NSD) or significantly different from (SDF) a69 at  
780 the *p* value stated. Statistical comparisons of strains were carried out as described in Materials  
781 and Methods. Values for the a69 mutant are indicated at the bottom of the table. Deficiency  
782 strains failing to complement a69, which are not statistically significantly different from a69, are  
783 shaded.

784 **S3 Table. Complementation of *hibris* alleles by Deficiency Strains.** A panel of seven  
785 deficiencies were crossed to a69, *hbs*<sup>361</sup>, *hbs*<sup>459</sup>, *hbs*<sup>1130</sup>, *hbs*<sup>2593</sup> and *cn*<sup>1</sup> *bw*<sup>1</sup> to test for  
786 complementation of the a69 mutant phenotype. The number of ommatidia counted expressing  
787 *Rh5* or *Rh6*, Total counted, and % *Rh5* are indicated in the table. The control for comparison  
788 was homozygous a69 mutants. The deficiencies failed to complement the tested genotype  
789 (shaded rows) or complemented the tested genotype (white rows). Complementation was

790 defined as significantly greater  $Rh5\%$  than (SGT) *a69* homozygous mutant at the  $p$  value  
791 shown using a one-tailed test. Statistical comparisons of strains were carried out as described  
792 in Materials and Methods. Values for the *a69* mutant are indicated at the bottom of the table.  
793 Crosses having results that differed from expected are noted (Exceptions).

794 **S4 Table. Strain Information.** Includes recombination stocks, deficiencies and alleles that  
795 complement *a69*. Stock genetics, Flybase ID and RRID are listed where available.



Fig 1

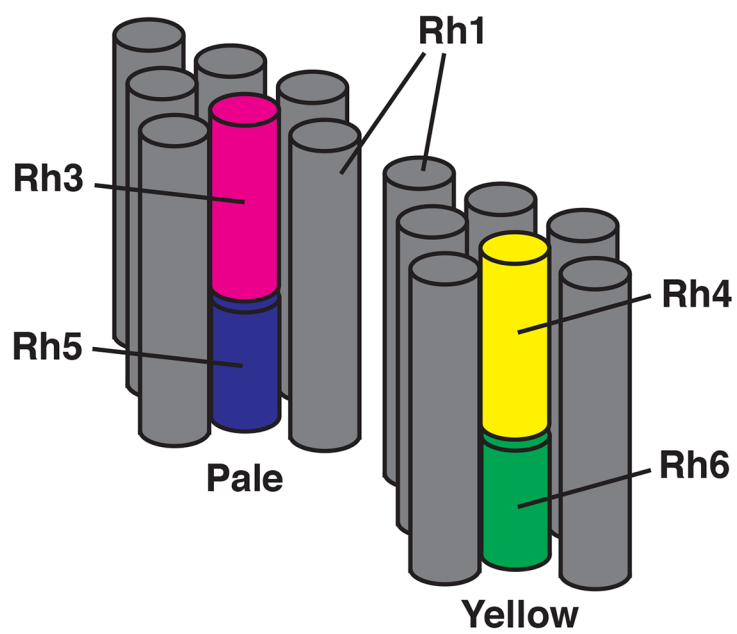

Fig 2

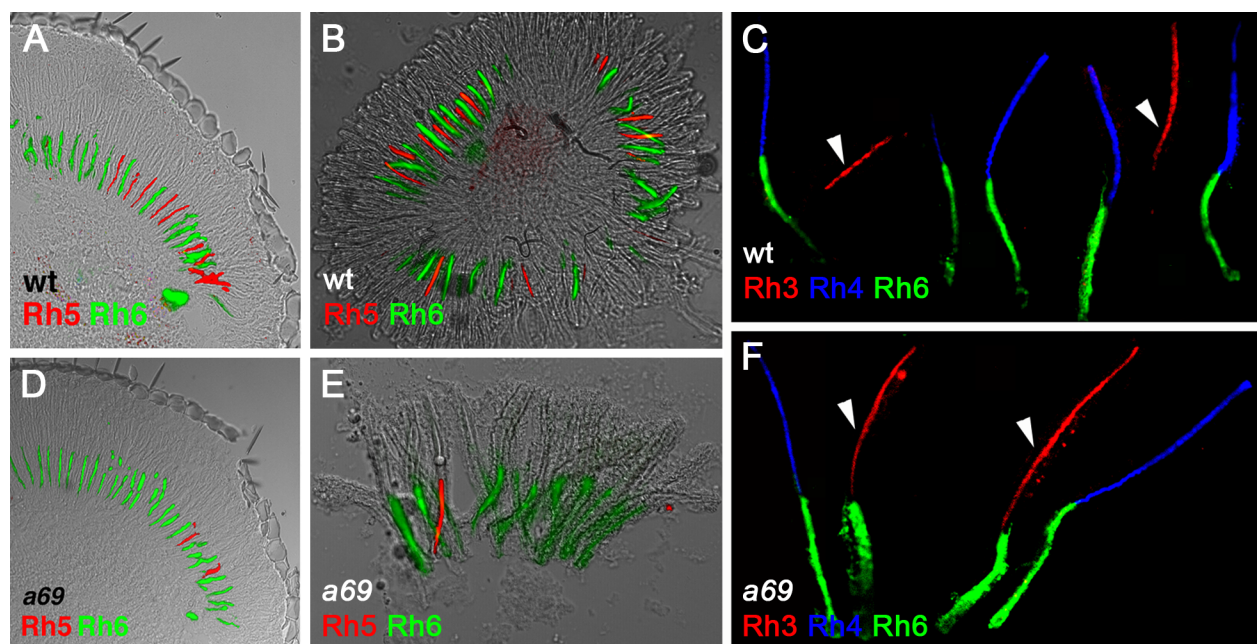

Fig 3

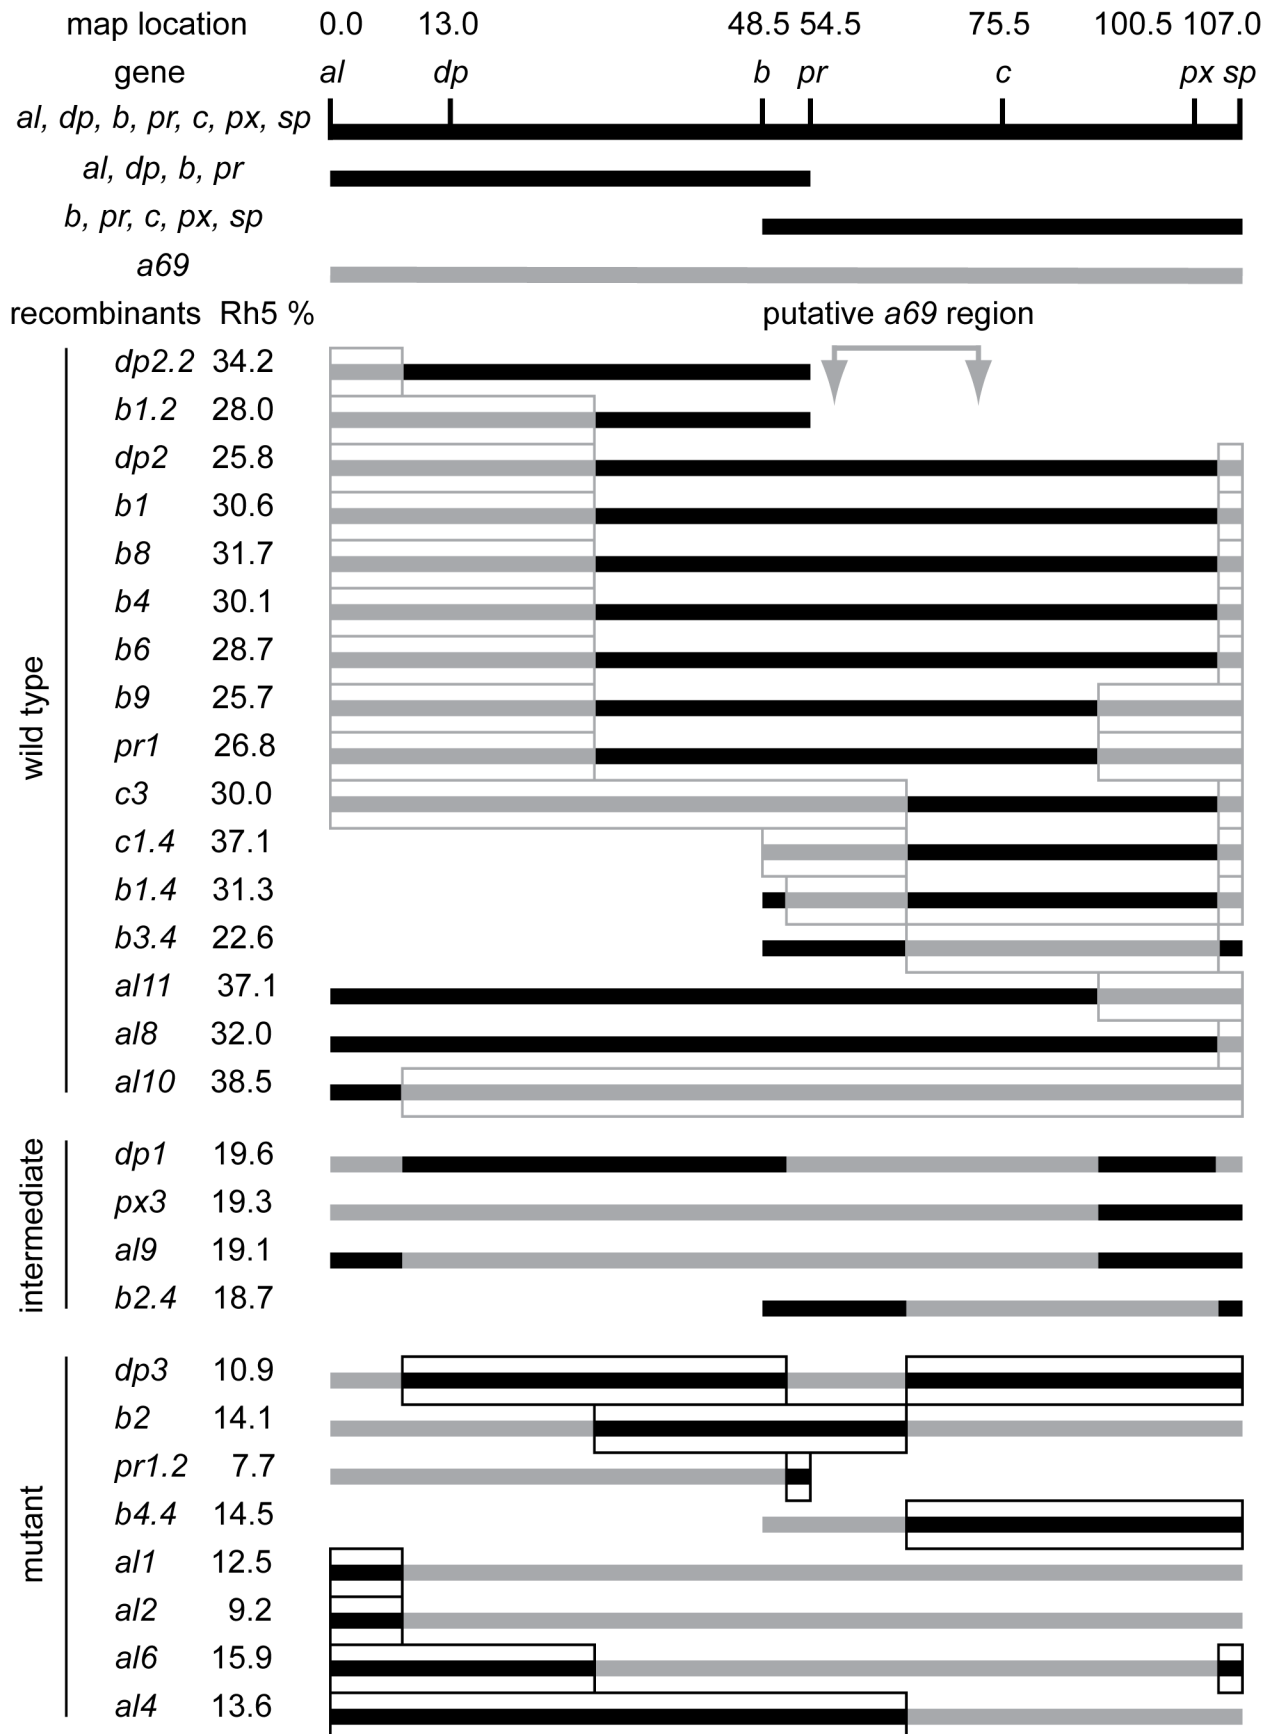

Fig 4

Deficiency Complementation

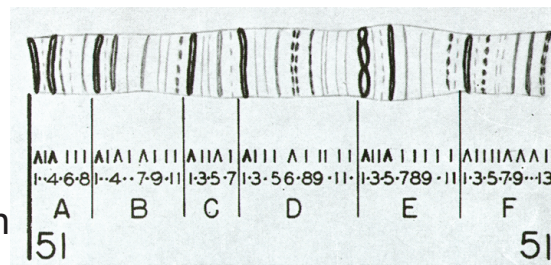

- + Df(2R)trix ——— 51A2-51B6
- Df(2R)knSA3 ——— 51B5-51D1
- Df(2R)Jp1 ————— 51C3-52F9
- + Df(2R)XTE-18 ————— 51D3-52D1

a69 ——— 51C3-51D1

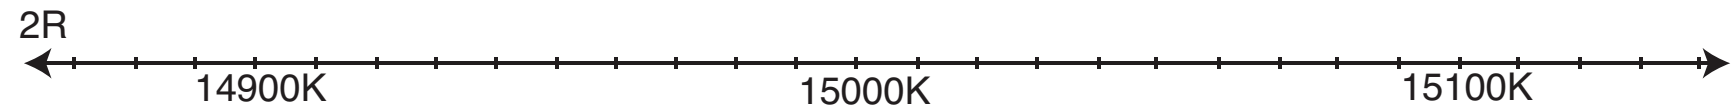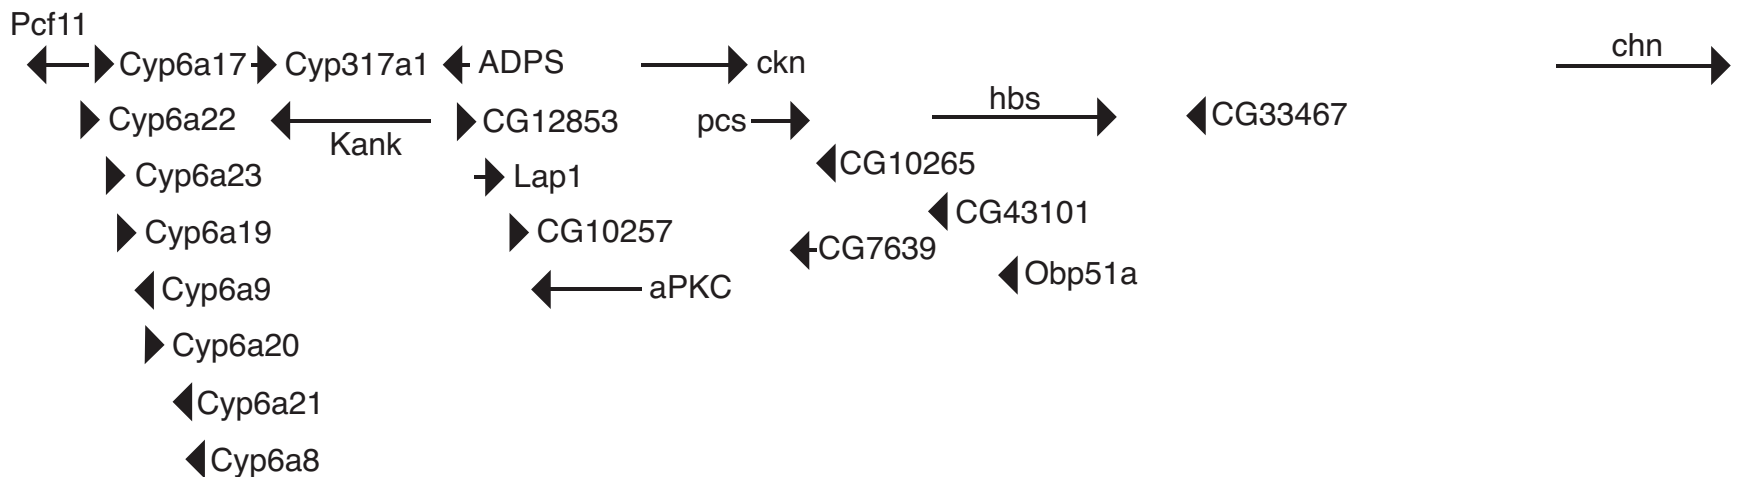

Fig 5

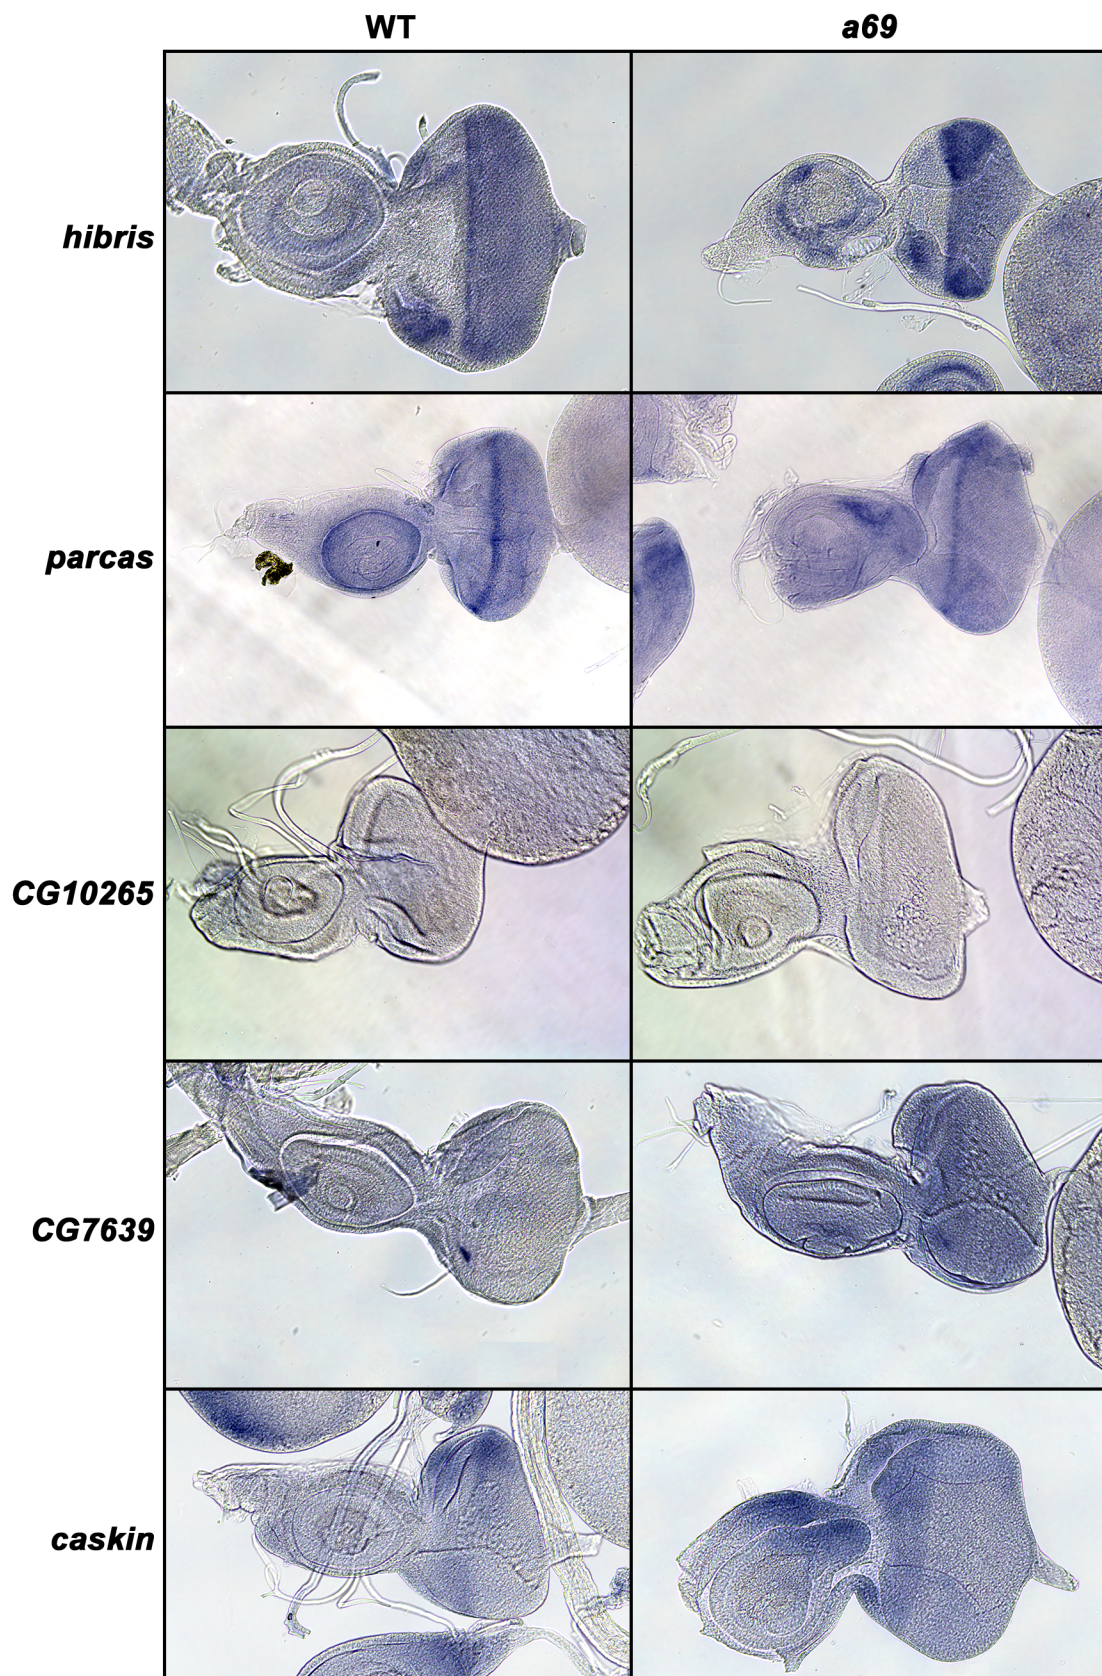

**Fig 6**

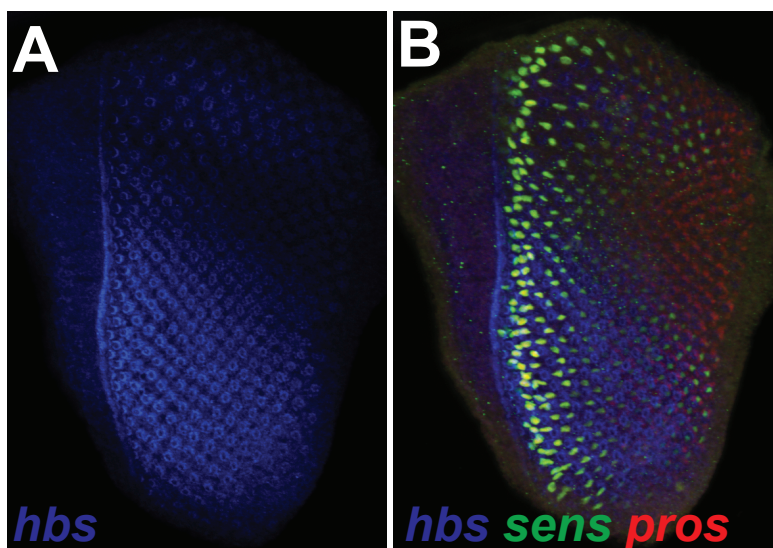

**Fig 7**

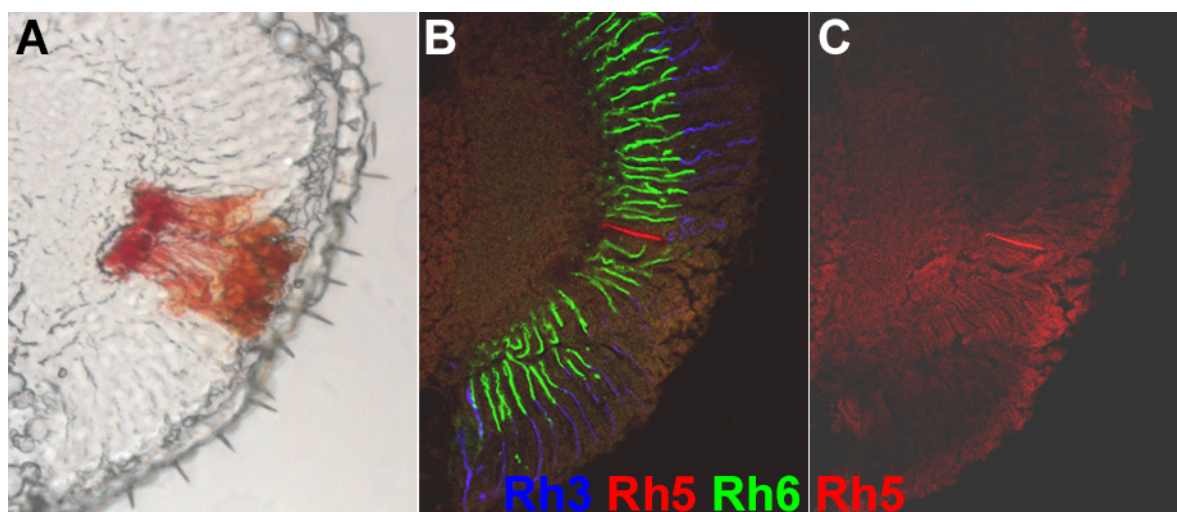

Fig 8

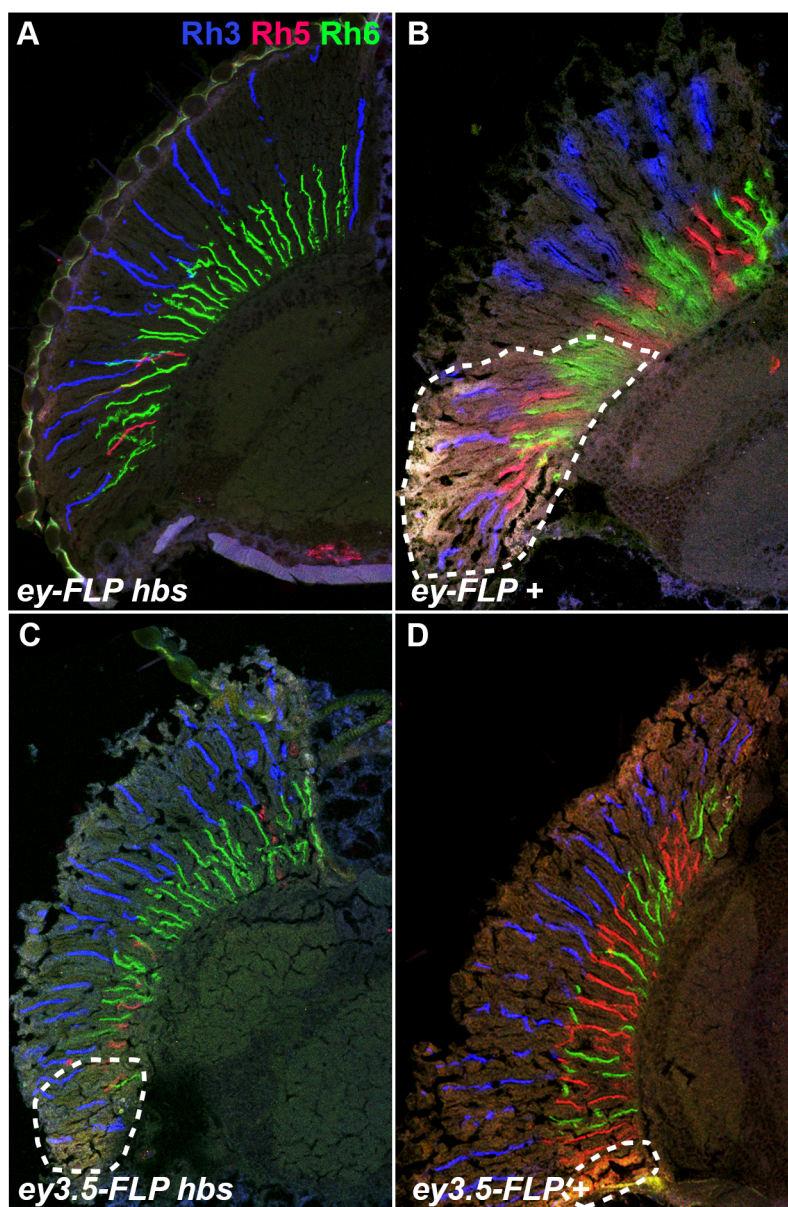



Fig 9

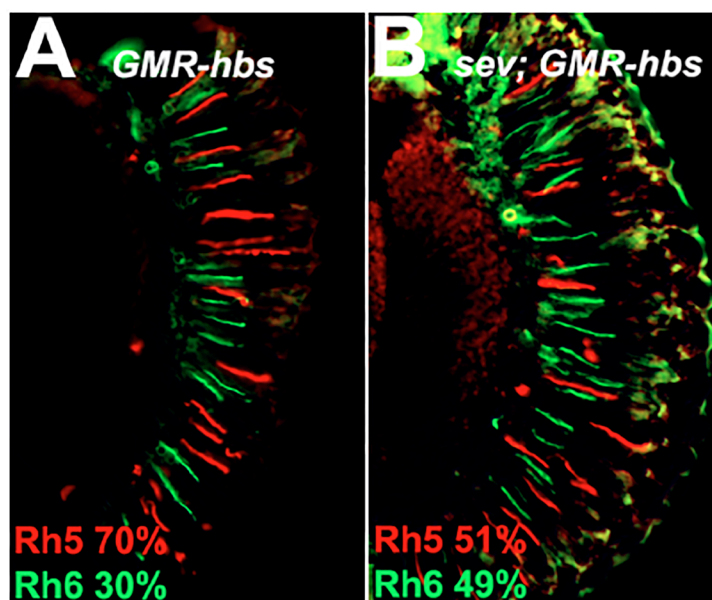

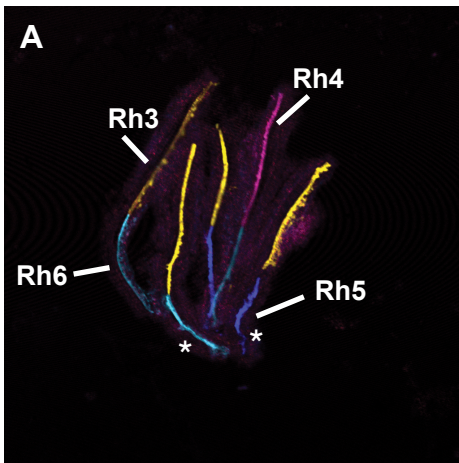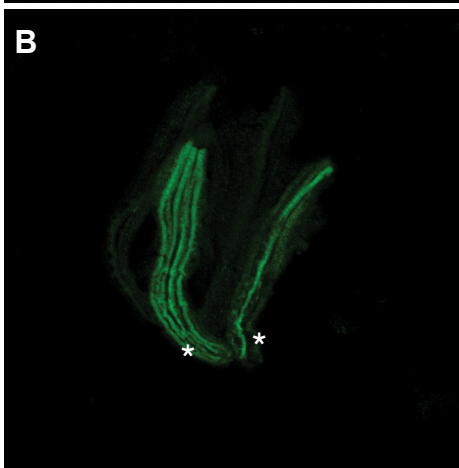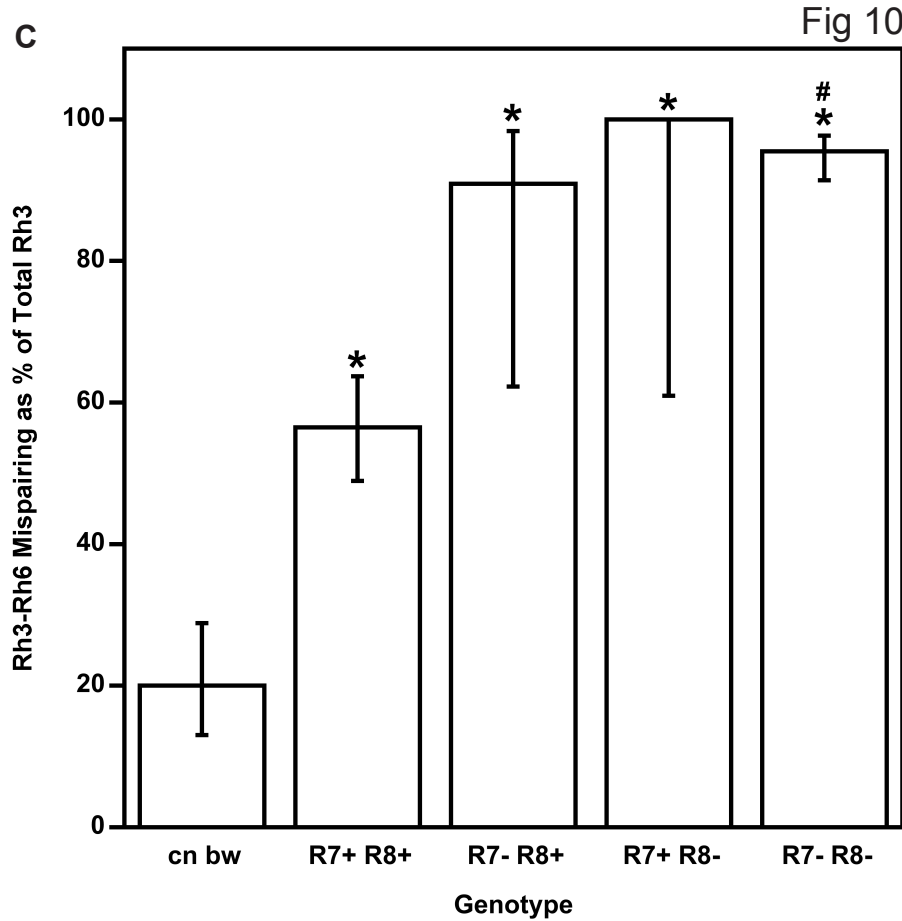

Fig 11

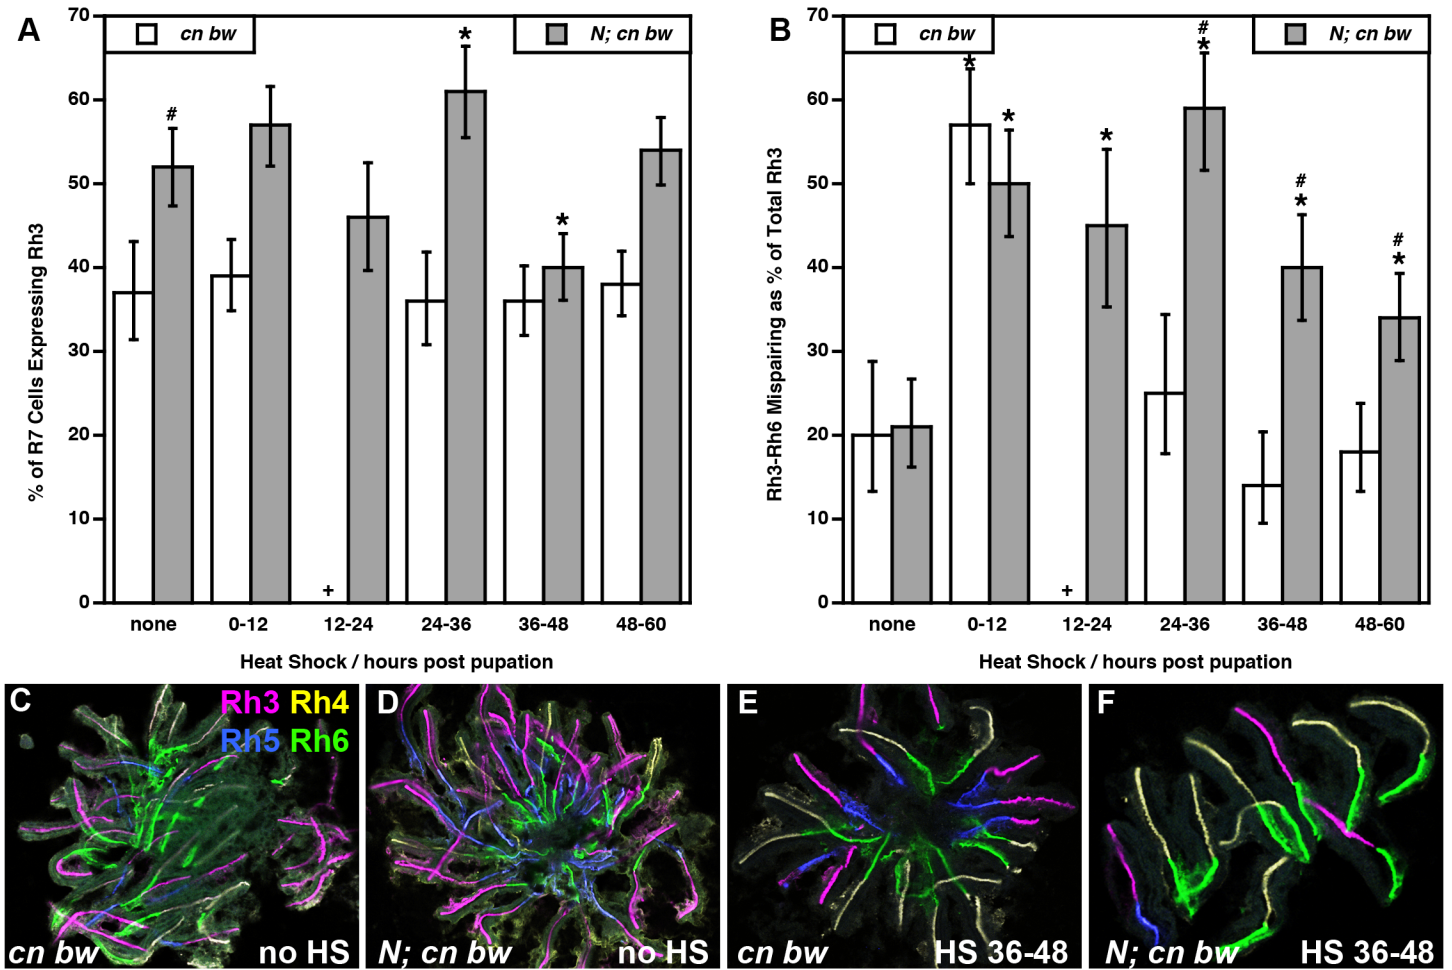

Source: http://biorxiv.org/content/10.1101/398222v1.full.pdf
